1 **Title**  
2 **A patient-centered comparative effectiveness research study of culturally appropriate**  
3 **options for diabetes self-management**

4  
5 **Short Title:**  
6 **Patient-centered comparative effectiveness of diabetes self-management options**  
7

8 **Authors**

9 Janet Page-Reeves<sup>1,2,&\*</sup>, Cristina Murray-Krezan<sup>3</sup>, Mark R. Burge<sup>4</sup>, Shiraz I. Mishra<sup>5,1</sup>, Lidia  
10 Regino<sup>2</sup>, Molly Bleecker<sup>2</sup>, Daniel Perez<sup>2</sup>, Hannah Cole McGrew<sup>6</sup>, Elaine L. Bearer<sup>7</sup>, Erik  
11 Erhardt<sup>8,&</sup>

12  
13 <sup>1</sup>Department of Family & Community Medicine, University of New Mexico Health Sciences  
14 Center, Albuquerque, New Mexico, USA

15 <sup>2</sup>Office for Community Health, University of New Mexico Health Sciences Center,  
16 Albuquerque, New Mexico, USA

17 <sup>3</sup>Department of Medicine, Division of General Internal Medicine, University of Pittsburgh,  
18 Pittsburgh, Pennsylvania, USA

19 <sup>4</sup>Eli Lilly and Company, Indianapolis, Indiana, USA

20 <sup>5</sup>Department of Pediatrics, University of New Mexico Health Sciences Center, Albuquerque,  
21 New Mexico, USA

22 <sup>6</sup>Connectus Health, Nashville, Tennessee, USA

23 <sup>7</sup>Department of Pathology, University of New Mexico Health Sciences Center, Albuquerque,  
24 New Mexico, USA

25 <sup>8</sup>Department of Mathematics and Statistics, University of New Mexico, Albuquerque, New  
26 Mexico, USA

27  
28 \*Corresponding author

29 E-mail: [JPage-Reeves@salud.unm.edu](mailto:JPage-Reeves@salud.unm.edu) (JPR)

30 <sup>&</sup>These authors contributed equally to this work.

31 **Abstract** (298 of 300 words)

32 This project compared the effectiveness of two evidence-based models of culturally competent  
33 diabetes health promotion: *The Diabetes Self-Management Support Empowerment Model*  
34 (DSMS), and *The Chronic Care Model* (CCM). Our primary outcome was improvement in  
35 patient capacity for diabetes self-management as measured by the Diabetes Knowledge  
36 Questionnaire (DKQ) and the Patient Activation Measure (PAM). Our secondary outcome was  
37 patient success at diabetes self-management as measured by improvement in A1c, depression  
38 sores using the PHQ-9, and Body Mass Index (BMI). We also gathered data on the cultural  
39 competence of the program using the Consumer Assessment of Healthcare *Providers and*  
40 *Systems Cultural Competence Set* (CAHPS-CC). We compared patient outcomes in two existing  
41 sites in Albuquerque, New Mexico that serve a large population of Latino diabetes patients from  
42 low-income households. Participants were enrolled as dyads—a patient participant (n=226) and a  
43 social support participant (n=226). Outcomes over time and by program were analyzed using  
44 longitudinal linear mixed modeling, adjusted for patient participant demographic characteristics  
45 and other potential confounding covariates. Secondary outcomes were also adjusted for potential  
46 confounders. Interactions with both time and program helped to assess outcomes. This study did  
47 not find a difference between the two sites with respect to the primary outcome measures and  
48 only one of the three secondary outcomes showed differential results. The main difference  
49 between programs was that depression decreased more for CCM than for DSMS. An  
50 exploratory, subgroup analysis revealed that at CCM, patient participants with a very high A1c  
51 (>10) demonstrated a clinically meaningful decrease. However, given the higher cultural  
52 competence rating for the CCM, statistically significant improvement in depression, and the  
53 importance of social support to the patients, results suggest that a culturally and contextually  
54 situated diabetes self-management and education program design may deliver benefit for  
55 patients, especially for patients with higher A1c levels.

56  
57 **Keywords:** Community-engaged research; patient-engaged research; Comparative effectiveness;  
58 Diabetes self-management; Depression; A1c levels; Patient activation; Cultural competence;  
59 Hispanic; Latino; LatinX; Social determinants of health; Health disparities; Health equity; Diabetes  
60 knowledge; Chronic care model; Social support; Low-income

61

62

## 63 **Introduction**

### 64 **Overview**

65 Here we report results from a non-randomized, pragmatic, quasi-experimental, patient-  
66 engaged, comparative effectiveness research (CER) study [1] conducted by researchers at  
67 [BLINDED] comparing two distinct evidence-based models for culturally competent diabetes  
68 self-management and education programming. We compared outcomes at two sites in  
69 Albuquerque, New Mexico, serving a large Latinx patient population from low-income  
70 households. Data reported here were gathered at baseline between February 2016 and March  
71 2020. The overall study protocol is described in detail elsewhere [1]. Data collection involved  
72 interviews, focus groups, surveys, and assessments of each program, and testing of patient  
73 participants for A1c, depression, and Body Mass Index (BMI). Survey responses, blood samples,  
74 and height/weight measurements were gathered at four time points (baseline, 3-months, 6-months,  
75 and 12-months). The [BLINDED] Human Research Review Committee/Institutional Review  
76 Board (HRRC/IRB # 16-303) approved all aspects of the research protocol.

### 78 **Background**

#### 79 **The specter of uncontrolled diabetes**

80 Diabetes is among the Institute of Medicine's top 25 national priorities for Comparative  
81 Effectiveness Research (CER) [2]. More than thirty-seven million people or 11.3% of the U.S.  
82 population have Type 2 diabetes [3]. While statistics this large can seem remote and impersonal,  
83 each patient member of our project team has life-altering personal experience with diabetes. Not  
84 only do they have diabetes or pre-diabetes themselves, they also have family members or  
85 multiple family members with diabetes. They report that diabetes is so common in the Latinx  
86 community that people just assume that they will get it, and if they are diagnosed with diabetes,  
87 that diabetes is a death sentence about which there is nothing they can do. So, most of the time,  
88 they do nothing. Our patient team members fear diabetes not only for themselves and their adult  
89 family members, but also for the future that awaits their children growing up with the specter of  
90 diabetes but without the knowledge, capacity, or skills to take control of their own health destiny.  
91 Our project sought to disrupt this fatalistic dynamic of despair. As such, our partners, who are  
92 Latinx patients from low-income households, their family members, and healthcare providers

93 who serve this population of patients recognize effective diabetes self-management as a matter of  
94 life and death.

95

## 96 **Diabetes health disparities**

97 Although diabetes is a national health crisis, risk is not the same for everybody.

98 Individuals from minority and ethnic populations and those with low-income status are at  
99 significantly higher risk [4]. Latinx adults are 70% more likely than non-Latinx white adults to  
100 be diagnosed with diabetes by a physician [5] and the risk of developing diabetes over the  
101 lifespan for Latinxs is 50% versus 40% for the overall U.S. population. According to an analysis  
102 of data from the U.S. National Longitudinal Mortality Study, Latinxs are also 28% more likely to  
103 die from diabetes, with Mexican Americans, representing 33.5 million people or 61.4% of U.S.  
104 Latinxs, ) 50% more at risk [6]. Rates for diabetes diagnoses (11.9%) and the diabetes death rate  
105 (45.9 per 100,000) for Latinxs are both more than twice those for non-Hispanic whites (5.3% and  
106 22.5) [7,8]. Not surprisingly, a national poll by Harvard University, National Public Radio  
107 (NPR), and the Robert Wood Johnson Foundation found that diabetes is the top health concern  
108 for Latinx families [9].

109 Similarly, poverty has an impact on diabetes risk. Research shows that individuals from  
110 low-income communities experience higher rates of diabetes [10–13]. Analysis of National  
111 Health Interview Survey data found that the “greatest disparities [for diabetes risk] were  
112 experienced by the groups who had the lowest level of education, were living below the Federal  
113 Poverty Level (FPL), or both [4].” This is a troubling concern for Latinxs given the high level of  
114 Latinx poverty (15.7%) [11]. In New Mexico, where Latinxs, who make up 47% of the  
115 population, have a poverty rate of 20.8% [14], ethnicity and poverty both play a significant role  
116 in diabetes health and health disparities. New Mexico is the second-poorest state in the nation,  
117 with poverty among Latinxs (24% for 18-64 year-olds and 37% for 17-and-under) significantly  
118 higher than among non-Hispanic whites (12% and 13%) [15]. Individuals in New Mexico from  
119 low-income households are nearly three times more likely to be diagnosed with diabetes (14%)  
120 than individuals from households making more than \$50,000 (5.2%) [3], meaning that given the  
121 Latinx poverty rate, diabetes risk for individuals from low-income Latinx households is  
122 disproportionately high.

123

## 124 **Gaps in evidence**

125 Biomedical approaches to diabetes care are well-established, but pharmacologic therapies  
126 are often extremely costly, may have problematic health side effects, do not always result in the  
127 intended improvement in patients' diabetes health, and involve hard-to-follow regimens given  
128 social and environmental barriers faced by low-income patients. Instead, health guidelines  
129 emphasize the important role of patient self-care over narrow reliance on medical treatments for  
130 reducing the health impact of diabetes and improving diabetes health outcomes. The *Guide to*  
131 *Community Preventive Services* instructs individuals to engage in lifestyle changes based on  
132 combined diet and physical activity improvements as the best way to prevent and manage Type 2  
133 diabetes [16]. The *Michigan Quality Improvement Consortium Guidelines for Management of*  
134 *Diabetes Mellitus* recommend that individuals be given “comprehensive diabetes self-  
135 management education.” [17]. *Recommended Lifestyle and Self-management Guidelines from the*  
136 *American Diabetes Association* discuss the importance of individualized education, monitoring,  
137 and counseling [18]. Individuals can self-manage their diabetes or prevent pre-diabetes from  
138 becoming full diabetes through daily physical activity, a healthy diet, minimizing stress, and for  
139 those with full diabetes, regular glucose self-monitoring [19]. But these are not things that can  
140 happen in the clinic or via prescription; they are things that patients must do to care for  
141 themselves every day.

142 Despite clear and consistent guidelines, diabetes health outcomes are not improving [19].  
143 The guidelines do not provide a roadmap for getting individuals to embrace necessary self-care  
144 practices. However, systematic reviews have repeatedly demonstrated that culturally competent  
145 health promotion approaches that account for a patient's culture and the social context of poverty  
146 can be vital to improving health outcomes [20–28]. In particular, culturally competent self-  
147 management interventions have been shown to significantly improve glycemic control and  
148 behaviors related to diet and physical activity, and increase diabetes-related knowledge. As a  
149 result, “cultural competence” has become prominent in diabetes health promotion. Various  
150 models have been developed to create “culturally competent” diabetes self-management  
151 programming [20–28]. Yet, there is no agreement on what “cultural competence” actually means  
152 or entails. Because of a continued emphasis on individual behavior in approaches to diabetes  
153 health promotion, the design of self-management programming does not always create cultural  
154 competence in a way that makes sense in the context of patients' lives or improves their health.

155

## 156 **Promising practices**

157 Different models are being used to make diabetes self-management programs culturally  
158 competent. However, this variation creates uncertainty for a patient with diabetes who does not  
159 understand that programs can differ significantly, how they differ, or which programs offer them  
160 the best option. For Latinx patients from low-income households, it is not clear which type of  
161 culturally competent self-management programming most effectively integrates their culture and  
162 accommodates their socio-economic circumstances in a way to best improve their diabetes  
163 health. This study addressed this gap by using issues identified as important by patients to design  
164 measures for directly comparing different evidence-based models for culturally competent  
165 diabetes self-management health promotion being implemented by programs that are currently  
166 available to Latinx patients from low-income households in Albuquerque, New Mexico. Our  
167 patient-engaged preliminary research suggested that the results of this study could offer  
168 significant benefit to patients trying to find support for developing the knowledge and capacity to  
169 self-manage their diabetes [29,30]. Patient stakeholders recognized the imperative of everyday  
170 diabetes self-care strategies, but lacked the knowledge and capacity to successfully adopt the  
171 changes outlined in the guidelines, thus improving their Hemoglobin A1c (glycosylated  
172 hemoglobin) and successfully controlling their diabetes. Improving models and approaches for  
173 diabetes self-care health promotion is critical to the health of our Advisors, their adult family  
174 members, and their children.

175

## 176 **Approach**

### 177 **Community Engaged Design**

178 We used a community-engaged research approach with the engagement of, and  
179 participation by, diverse patient stakeholders, including Latinx diabetes patients and their social  
180 supports, Latinx community health workers (CHWs), Latinx diabetes educators [31–34], and  
181 partner community agencies serving Latinx clients. A patient advisory board identified the  
182 research question and contributed to the design and implementation of the study. Patient  
183 stakeholders participated in all aspects of the research. The community co-principal investigator  
184 (Co-PI), the project coordinator, the primary research site director, the research manager, and  
185 three data collectors were from the population of study [31,34]. We convened a 10-member

186 Patient Advisory Board (PAB) of patients, individuals who provide care or social support to a  
187 person(s) with diabetes (hereafter, “social supports”), and researchers. Patients and patient  
188 stakeholders participated in the study across the continuum of engagement, including shared  
189 leadership, collaboration, consultation, and input at every stage.

190

## 191 **Rationale**

192 The idea for this study came from our patient partners. In 2009, a CHW at One Hope  
193 Centro de Vida Health Center (referenced hereafter as One Hope) who knew PI Page-Reeves  
194 asked her for help because the CHW saw a rising problem of diabetes in the Latinx community  
195 that was not being addressed, and she felt that patients did not really understand their diabetes or  
196 know what to do when they were diagnosed. We obtained pilot funding through [BLINDED] to  
197 assess the problem's dimensions and obtain community input regarding diabetes health and ideas  
198 for prevention. We mapped local Geographic Information System (GIS) data and conducted a  
199 survey and blood analysis for A1c with 100 people, conducted interviews with key community  
200 stakeholders, and held a series of focus groups with patients and social supports. Our PAB  
201 participated in designing focus group/interview questions and interpreting findings. Results from  
202 the pilot [29,30] provided a roadmap for a CCM diabetes self-management initiative at One  
203 Hope. This laid the foundation for us to receive funding from the Patient-Centered Outcomes  
204 Research Institute (PCORI) to engage patients, social supports, stakeholders from different  
205 diabetes programs, and university researchers in designing this study.

206 We provided a respectful and culturally appropriate environment for PAB meetings [33].  
207 Our PAB included individuals who were uncomfortable speaking in English or did not  
208 understand English. PAB meetings were conducted in Spanish as the default language. If we  
209 brought in content experts or researchers who did not speak Spanish, we provided them with an  
210 English translation, but we still held the meetings in Spanish to acknowledge patients as at the  
211 core of the process. During the planning process, we provided trainings to help our PAB  
212 members develop their capacity to participate in and contribute to the research. We held PAB  
213 meetings at One Hope clinic, an accessible location for PAB members that does not have the  
214 challenges of parking that exist at the university.

## 215 **Models for comparison**

### 216 **Local context for each model**

217 The two models being compared were the Diabetes Self-Management Support  
218 Empowerment Model (DSMS) and [35] the Chronic Care Model (CCM) [28,36]. Each program  
219 serves a large population of Latinx patients from low-income households in Albuquerque, New  
220 Mexico, and employs a distinct evidence-based approach to create program cultural competence.  
221 Patient participants were recruited from both programs. One program, the Center for Diabetes  
222 Education at the University of New Mexico Hospital (CDE-UNMH), is based at a university  
223 hospital and uses the DSMS [35]. The other, One Hope, is based at a community clinic operated  
224 by a faith-based nonprofit and uses the CCM approach [28,36].

225

### 226 **The Diabetes Self-Management Support Empowerment Model (DSMS)**

227 The DSMS is a patient-centered, theoretically based educational framework that follows  
228 National Standards for Diabetes Self-Management Education [35], is certified by the American  
229 Diabetes Association [37], and is accredited by the American Association of Diabetes Educators  
230 (AADE) [37]. The DSMS combines a series of clinically informed group didactic sessions that  
231 use a patient self-determination approach to empower patients to take control of their own  
232 diabetes health with follow-up support to sustain self-management gains achieved during the  
233 sessions. The AADE requires that educators acquire proficiency in culturally competent  
234 supportive care across the lifespan as one of five domains for certification so that educators can  
235 be informed about and aware of specific challenges that might accrue in the patient's diabetes  
236 self-management experience. This program represents the gold standard for diabetes self-  
237 management education, focusing on changing eating and physical activity behaviors, self-  
238 monitoring, risk reduction, and stress management. The CDE-UNMH program uses the DSMS  
239 group education approach. Patients attend a six-week group instructional session with nine hours  
240 of class plus a one-on-one follow-up with a certified diabetes educator to provide individualized  
241 support by creating a customized education plan. The group sessions have discussions supported  
242 by didactic conversation “maps” where the facilitator guides but does not control the  
243 conversation based on session thematic goals. Patients then complete self-assessment forms. This  
244 format is the foundation of the DSMS Model for creating patient empowerment and program  
245 cultural competence.



## 246 **The Chronic Care Model (CCM)**

247 The CCM is “a systematic approach to restructuring medical care to create partnerships  
248 between health systems and communities” [28,36] by addressing not only the medical but also  
249 the cultural and linguistic needs of patients through the inclusion of cultural competence in the  
250 delivery system design [28]. The CCM involves six synergistic domains: 1.) Improved access to  
251 care, 2.) Patient self-management support, 3.) Patient decision support, 4.) Care coordination, 5.)  
252 Integrated health information systems, and 6.) Access to community resources. The use of the  
253 CCM framework has yielded significant results in treating diabetes and is being used widely in  
254 chronic disease management [36]. To create a holistic care regime, the CCM focuses on  
255 addressing social determinants of health by meeting patients' medical, cultural, and linguistic  
256 needs through integrating cultural norms and social relationships from the patient population into  
257 program design [24].

258 The *One Hope Program* is based on the CCM and is designed to address the specific  
259 needs of Latinx patients from low-income households [25,30] by creating comprehensive,  
260 integrated, wrap-around services focused on culturally competent care [24]. One Hope  
261 emphasizes Spanish as the language for service provision [29,30] and access to care regardless of  
262 ability to pay. The One Hope facility provides a physical environment that reflects patients'  
263 lifestyle and economic capacity to make them feel comfortable and that they “belong” (in  
264 contrast to more clinical, corporate, or academic medical settings). One Hope is a community-  
265 run clinic with a director and staff who are members of the community and who are culturally  
266 and economically similar to the patients they serve, reducing the hierarchical power relationship  
267 that generally exists between patients and providers. This approach is evident in the way that  
268 doctors at One Hope share decision-making by engaging the patient and their family members in  
269 creating a plan for diabetes self-management.

270 In addition, patients, caregivers, and family members participate in a variety of program  
271 activities including cooking and nutrition workshops, *zumba* classes, and *citas compartidas*  
272 sessions (“shared appointments”) [38,39]. These shared appointment sessions allow patients,  
273 social supports, and family members to share their stories and experiences in a peer support  
274 setting with facilitation by medically trained providers. But providers also “co-learn” from the  
275 patients [25,40,41]. Through shared decision-making and shared appointments, providers learn  
276 about the realities of patients' lives and their daily struggles at a level beyond the interaction

277 normally occurring in a clinic. This helps the provider to be culturally competent by  
278 understanding diabetes from the perspective of the patient. Sharing experiences with peers and  
279 providers and including family members in activities offers a different level of social support for  
280 the patient by creating an enhanced feeling of intimacy and inclusion within the program.  
281 Innovative *salidas* (exit interviews), conducted routinely with all patients by a bilingual health  
282 navigator, ensures that the patient understands and feels capable of implementing a doctor's  
283 instructions, and integrates care delivery by allowing the health navigator to communicate details  
284 of patient status back to the provider [29].

285

## 286 **Research question**

### 287 **Development of the research question**

288 *"I have diabetes, but I am not just a patient. I am a person. I have cultural values and*  
289 *concrete realities that shape my everyday life. Both need to be considered for me to*  
290 *be able to feel that my care is making me well and to make it more likely that I can*  
291 *control my A1c. With this in mind, which of two self-management programs is the*  
292 *most culturally and contextually appropriate option for me to take the best care of*  
293 *myself in relation to my diabetes?"*<sup>[Translation from Spanish]</sup>

294

295 We co-developed this research question with our PAB. Specifically, they were concerned  
296 about the failure of diabetes self-management programming to account for important dimensions  
297 of Latinx culture or the social context created by poverty. At our PAB meetings, patients and  
298 social supports discussed these issues with us extensively and with emotion. What they had to  
299 say supported what we heard in previous conversations with patients and community members,  
300 and in our preliminary research [29,30]. Patients, social supports and community members  
301 reported: a.) A lack of cultural competence on the part of providers, b.) A lack of programming  
302 in Spanish, c.) Failure of program design to understand or accommodate the dynamics of Latinx  
303 culture related to core values prioritizing the importance of social relationships and the need to  
304 avoid personal conflict [41,42]. d.) Poor program accommodation of the fact that patients lack  
305 resources, and [40] e.) A lack of attention to the extent to which poverty results in low diabetes  
306 health literacy, low capacity to deal with chronic disease, and high stress [40]. All of these  
307 factors influence patients' ability to comply with recommendations regarding drugs, diet, and  
308 physical activity to self-manage their diabetes. This question guided the research.

309

## 310 **Theoretical framework**

311 Trickett proposes that cultural competence entails integrating components of an  
312 intervention “into the local expression of culture as reflected in the multiple levels of the  
313 ecological context” [43,44]. Rather than merely “tailoring” an existing intervention to target a  
314 specific context or population (for example, by offering recipes for healthy meals using Latinx  
315 cuisine or providing educational materials in Spanish), he emphasizes the need for interventions  
316 to be “situated” to fit synergistically within broader community dynamics (culture and socio-  
317 economic context). Following Trickett, and reflecting input from our patient partners, we  
318 hypothesized that getting people to adopt lifestyle and behavior changes outlined in guidelines  
319 for diabetes self-management requires positively leveraging the cultural values and  
320 accommodating the socio-economic circumstances of a patient population in a way that creates  
321 synergy with specific social dynamics that define patients’ everyday lives [29,30] (Fig 1).  
322 Therefore, our overarching study hypothesis was that diabetes self-management programs are  
323 most successful if their design is culturally and contextually “situated.”

324

325 **Fig 1. Diagram of relationships between study elements.** A1c levels is used as a biomarker of  
326 serum glucose, and indicator of diabetes. A1c, glycated hemoglobin A1c; BMI, body mass index.

327

## 328 **Specific aims**

329 This study had three specific aims:

330 **Aim #1.** Measure and compare the improvement in patient capacity for diabetes self-  
331 management as indicated by improvement in diabetes knowledge and patient activation.

332 **Aim #2.** Measure and compare patient success at diabetes self-management as indicated  
333 by improvement in A1c, depression index score, and body mass index (BMI).

334 **Aim #3.** Characterize the ways that two distinct culturally competent diabetes self-  
335 management programs interface with patient culture and socioeconomic context.

336

## 337 **Outcome measures**

338 While changes in diet or levels of physical activity are commonly understood as  
339 measures of diabetes health [19], our PAB told us that acquiring the capacity for diabetes self-

340 management must occur first. They said there is too much focus on diet and physical activity  
341 when other things are more important for getting people to the point where they can take care of  
342 themselves. They said that if they do not understand their diabetes, they cannot even begin to  
343 self-manage their condition. But beyond knowledge, they said that it is important for researchers  
344 to determine what helps patients move from knowing to taking action. They saw “capacity”—our  
345 primary patient-reported outcome—as comprised of this combination of knowledge and ability  
346 to take action.

347

### 348 **Improved patient capacity for diabetes self-management**

349 For our primary outcome, we identified two validated and reliable instruments available  
350 in both English and Spanish. Capacity for diabetes self-management was measured using the  
351 Diabetes Knowledge Questionnaire (DKQ) and the Patient Activation Measure (PAM).

352

353 1. Diabetes knowledge was measured using the *DKQ summed score*.

354 Hypothesis: The *Chronic Care Model* (CCM) model would result in a larger  
355 increase in DKQ summed scores from baseline to 6 months as compared to the  
356 *Diabetes Self-Management Support Empowerment Model* DSMS. Previously  
357 published studies evaluating culturally competent diabetes management programs  
358 report meaningful changes in DKQ summed scores with Cohen’s *f* effect sizes of 0.03  
359 to 0.16 in studies ranging in sample sizes per arm from 10 to 189 [45–48].

360

361 2. Patient activation was measured using the *PAM-10 raw score*.

362 Hypothesis: The CCM model would result in a larger increase in PAM-10 raw  
363 scores from baseline to 6 months as compared to the DSMS. Previously published  
364 studies evaluating culturally competent diabetes management programs report changes  
365 in PAM-10 raw scores with meaningful Cohen’s *f* effect sizes of 0.01 to 0.16 in studies  
366 ranging in sample size per arm from 26 to 133 (per Shah, Co-I Burge, and colleagues)  
367 [49–53].

368

## 369 **Improvement in A1c, BMI, and PHQ-9**

370 For our secondary outcome of successful diabetes self-management, we used A1c, BMI,  
371 and a depression scale score from the patient health questionnaire (PHQ-9) [54–56]. We chose  
372 A1c because our patients worry a great deal about their A1c levels and because it is the widely  
373 accepted standard for assessing glycemic control. To enhance the scientific quality of our  
374 research design, we added BMI as a proxy for improved diet and physical activity. Our advisors  
375 also identified depression as an important issue, so we included a depression scale score.

376

377 1. Hypothesis: The CCM model would result in a larger decrease in percent A1c from  
378 baseline to 6 months as compared to the DSMS. Previously published studies and  
379 institutional experience evaluating culturally competent diabetes management programs  
380 report changes in percent A1c with Cohen’s *f* effect sizes of 0.01 to 0.06 in studies  
381 ranging in sample size per arm from 26 to 133 [50–53].

382

383 2. Hypothesis: The CCM model would result in a larger decrease in BMI from baseline to 6  
384 months than DSMS with a clinically meaningful difference of 1.5 kg/m<sup>2</sup> between the  
385 groups (Cohen’s *f* ES = 0.06) [57,58].

386

387 3. Hypothesis: Compared to DSMS, CCM would result in a larger decrease (by 3 points) in  
388 PHQ-9 scores from baseline to 6 months (Cohen’s *f* ES = 0.06) [53,59,60].

389

390

## 391 **Methods**

### 392 **Research setting**

393 New Mexico, one of six majority-minority states (as of July 2019), has the largest  
394 percentage of Latinxs in the United States (46.3%). Of New Mexico’s nearly one million Latinx  
395 residents, most are of Mexican ancestry (62%) [61]. In Albuquerque, 47% of the population is  
396 Latinx. In New Mexico, 18.9% of Latinxs live in households below the FPL and 12.4% of  
397 Latinxs have diabetes.

## 398 **Participants**

399

### 400 **Dyadic enrollment design**

401 We enrolled participants as dyads, where half were patients diagnosed with diabetes or  
402 pre-diabetes (“patient participants”) and half were individuals identified by the patient  
403 participant as someone in their lives who provides them with significant social support (“social  
404 support participants”). This research design was developed to respond to patient advisory board  
405 input that the importance of social relationships in Latinx culture tends to be ignored in both  
406 health research and health care. Including patient-social support dyads was a mechanism for  
407 incorporating the social dimension of patient’s lives in our research. Patient participants provided  
408 data related to their own health or experience. Social support participants primarily provided data  
409 on their perspective on their patient partner's health.

410

### 411 **Patient participants**

412 Patient participants were individuals entering one of the two programs during the period  
413 of the study either because they were newly diagnosed with diabetes or pre/diabetes, or because  
414 they were having trouble managing their blood sugar levels. They were entering a program in  
415 order to obtain skills and information to improve their knowledge about diabetes and increase  
416 their capacity for self-management. Patient participants were adults ( $\geq 18$  years old), self-  
417 identified as Latinx(a), self-reported household income below 250% of the FPL, and were able to  
418 identify a social support who was willing to participate in the study. We used 250% of FPL  
419 because research has shown that individuals at 250% of the FPL are still “poor” in that they  
420 cannot afford all of the basic necessities for a healthy life [62]. Therefore, all patient participants  
421 in the study were “low-income.”

422

### 423 **Social support participants**

424 The only requirements for social support participants were that they had to be adults ( $\geq 18$   
425 years old) and had to be willing to participate in the research. The social support did not have to  
426 be an actual “caregiver” to the patient, nor were they screened for ethnicity or income in order to  
427 participate.

428

## 429 **Data collection**

### 430 **Data collectors**

431 Three patient stakeholder data collectors [1,34,63] were trained in survey administration,  
432 the collection of biological samples (phlebotomy), and in research methods, including human  
433 subjects ethics, research protocols, consenting procedures, how to use a tablet to gather survey  
434 responses, and to use Realtime Electronic Data Capture (REDCap), the secure data capture  
435 system used and supported by the [BLINDED]. All three data collectors were native Spanish  
436 speakers. One was completely bilingual in Spanish and English, one was semi-fluent in English,  
437 and one was a monolingual Spanish speaker. Participants chose the language (English or  
438 Spanish) used for consent and data collection appointments, and data collectors were assigned  
439 accordingly.

440

### 441 **Timeframe**

442 Data were gathered at baseline between February 2016 and March 2020 [1]. Each  
443 participant was enrolled in the study for 12 months. Some 12-month data collection  
444 appointments were prematurely halted two weeks early in March 2020 due to the COVID-19  
445 pandemic.

446

### 447 **Data collection frequency**

448 We gathered data from all participants at four time points (baseline, three months, six  
449 months, and 12 months). Baseline collection occurred before the patient participant began any  
450 program activities. All participants received a \$50 merchandise card for attending each data  
451 collection appointment.

452

### 453 **Data sources**

454 We used four data sources: surveys, physical measures (A1c and BMI), patient  
455 participant and social support participant interviews/focus groups, and a program assessment of  
456 each site.

457

458 **Surveys.** At baseline, all participants were asked demographic questions. At all four time  
459 points, we asked questions from validated survey instruments.

- 460 • To measure patient understanding of what diabetes is, we used the Diabetes Knowledge  
461 Questionnaire (DKQ) [45–48].
- 462 • To measure patient ability to self-manage their diabetes, we used the Patient Activation  
463 Measure 10 (PAM-10) [38,64–71].
- 464 • To measure patient depression levels, we used the nine-question version of the Patient  
465 Health Questionnaire (PHQ-9) [54–56].
- 466 • To measure patient and social support perception of and experience with the cultural  
467 competence of their program, we used the Consumer Assessment of Healthcare *Providers*  
468 *and Systems Cultural Competence Set* (CAHPS-CC) ] (not asked at baseline). Two  
469 additional PAM-style questions were added regarding social support.

470 Patient participants were asked questions about their own health. Patient participants  
471 were asked to respond to questions from their own perspective. Social support participants were  
472 asked to respond to demographic questions and the diabetes knowledge about themselves, but to  
473 answer the rest of the questions based on their perception of their patient participant partner.

474

475 **Physical measures.** At all four time points, we gathered blood samples and took height  
476 and weight measurements from patient participants only.

- 477
- 478 • A1c. The phlebotomy-trained Patient Stakeholder Data Collectors (PDCSs) drew blood  
479 samples that were tested at a UNM lab. For A1c (>10), we notified the participant.
- 480
- 481 • BMI. The PDCS documented patient participant height and weight using a standardized  
482 protocol. Height measurements were collected using SHORR boards against flat walls on  
483 level, firm (not carpeted) flooring. Weight measurements were collected using calibrated,  
484 research-grade scales. Two measurements were at each data collection point, and BMI  
485 was an average of the two measures.

486

487 **Interviews and focus groups with participants.** Data from interviews and focus groups  
488 gathered by bilingual staff were used to provide qualitative information for all three aims.  
489 Scheduling of participants for either an interview or a focus group was based on logistical  
490 considerations related to participant availability. Interviews were conducted with individual



491 participants; in some cases, we interviewed both the patient and social support participants.  
492 Focus groups of six to eight participants included both PPs and SPPs. Questions (Appendix) in  
493 interviews and focus groups were created to be very similar. Sessions were audio-recorded and  
494 transcribed and lasted one to two hours. Participants received a \$50 merchandise card.

495 **Program assessment.** To assess the program interface with PP culture and context as a  
496 measure of cultural competence and “situatedness,” our program interface assessment used four  
497 sources:

- 498 • ***Inventory cataloging program components and information.*** We cataloged components  
499 of each site regarding program design, size, structure, operation, and  
500 theoretical/philosophical orientation, professional qualifications/training of program  
501 providers, activities or resources available through the programs, strategies in place for  
502 Spanish language use or acceptance, inclusion of social support participants and family,  
503 accommodation of challenges created by patient participants’ limited socioeconomic  
504 circumstances, the inclusion of stress management techniques, and data on referrals to the  
505 program, sign-ups, participation, no-shows, and attrition.  
506
- 507 • ***Interviews with program staff.*** We conducted interviews with all relevant staff and  
508 providers to obtain their perspectives on the implementation of the programs.  
509
- 510 • ***Patient and social support participant interviews and focus groups.*** We used data from  
511 the interviews and focus groups described above to assess participant perceptions of  
512 program interface. The questions (Appendix) included domains related to respectful  
513 treatment, language, and perspectives on the operation of the program, including the  
514 factors that were most helpful and what was missing or could be improved.  
515
- 516 • ***Cultural competence survey.*** As indicated, the *Consumer Assessment of Healthcare*  
517 *Providers and Systems Cultural Competence Set (CAHPS-CC)* has questions about the  
518 participant’s experience with and perception of the program.

519  
520 We made three changes to our original study protocol. One DKQ question was excluded because  
521 of lack of clarity in the wording of the question. The PAM-10 was used instead of PAM-13 to

522 reduce burden on participants. After conducting interviews in Years 1 and 2, we reached thematic  
523 saturation and, with the approval of our PCORI Program Officer, determined not to conduct  
524 further interviews.

525

## 526 **Data management**

527 The data were stored in REDCap and were assessed for quality and consistency. Analysis  
528 variables were created, including BMI categories, instrument summary scores, and income-to-  
529 federal poverty level ratios. Data were anonymized by removing demographic identifiers and  
530 randomly shifting all dates associated with a patient record within 180 days for each patient  
531 participant.

532 Care was taken during data collection to mitigate missing data. The largest set of missing  
533 responses came from participants unable to complete 12-month follow-up appointments due to  
534 the COVID-19 pandemic (7 of 98 at CCM from 6 to 12 months, Fig 2<sup>1</sup>). Missing values were  
535 imputed using the method “Multivariate Imputation by Chained Equations” via the mice R  
536 package with separate patient and social support blocks [73].

537

538 Fig 2. **Diagram of enrollments (CONSORT diagram)**. DSMS, diabetes self-management  
539 support empowerment model; CCM, chronic care model.

540

## 541 **Qualitative Analysis**

542 We conducted a rigorous, disciplined, empirical analysis of qualitative data using  
543 Hammersley’s criteria for qualitative research based on plausibility, credibility, and relevance  
544 [74]. We conducted a theory-driven qualitative content analysis according to standards  
545 developed by Gläser and Laudel]. Three members of the research team (two bilingual) read  
546 through transcripts to identify conceptual categories and patterns related to specified domains of  
547 inquiry, and created a qualitative codebook. We explored interconnections between theme  
548 categories and developed a holistic interpretation of the data (“constant comparison”).

549

## 550 **Quantitative Analysis**

551

---

<sup>1</sup> This figure was previously published in [72].

## 552 **Sample size and Power Calculations**

553 Our goal was to recruit N=240 patient-social support pairs (N=120 per site) in order to  
554 obtain complete data on N=96 pairs per site, assuming a 20% attrition rate. A power analysis  
555 [63,75] showed that N=96 provided at least 80% power to detect hypothesized changes over time  
556 (described below) in the longitudinal analyses for each of the two primary endpoints (DKQ and  
557 PAM-10) and for each of the three secondary endpoints (A1c, BMI, and PHQ-9). Comparing  
558 response changes on the DKQ, PAM-10, and PHQ-9 from baseline to 6 months between the  
559 CCM to the DSMS, the two-sided Type I error rate was adjusted for the number of comparisons  
560 made (two comparisons for the co-primary outcomes) using a Bonferroni correction ( $\alpha=0.025$ ).  
561 The power analyses for detecting site differences among change scores were based on multiple  
562 linear regression models including demographic characteristics, participants' perceived cultural  
563 competence of providers (CAHPS-CC), and social supports' change scores on the DKQ, PAM-  
564 10, and PHQ-9 as covariates. We report Cohen's *f* effect sizes based on the regression method,  
565 where Cohen's standards for "small", "medium", and "large" effects are 0.02, 0.15, and 0.35,  
566 respectively [76,77].

567

568 The power for the primary endpoints with n=96 per site and  $\alpha=0.025$  for comparing the  
569 CCM to the DSMS was as follows

- 570 1. Change in DKQ summed score:  $\Delta_{\text{CCM-DSMS}} = 2.2$  (SD = 3.8), power = 96%, Cohen's *f*  
571 effect size (ES)=0.09
- 572 2. Change in PAM-10 raw score:  $\Delta_{\text{CCM-DSMS}} = 12.7$  (SD = 24.8), power = 85%, Cohen's *f*  
573 ES=0.07

574

575 The power for the secondary endpoints with n=96 per site and  $\alpha=0.017$  for comparing the  
576 CCM to the DSMS was as follows

- 577 1. Change in A1c:  $\Delta_{\text{CCM-DSMS}} = -0.5$  (SD=1.0), power = 84%, Cohen's *f* ES=0.06.
- 578 2. Change in BMI:  $\Delta_{\text{CCM-DSMS}} = -1.5$  (SD=3), power = 84%, Cohen's *f* ES=0.06.
- 579 3. Change in depression scores (PHQ-9):  $\Delta_{\text{CCM-DSMS}} = -3$  (SD=6), power = 84% Cohen's *f*  
580 ES = 0.06.

581

## 582 **Statistical analysis**

583 Descriptive statistics were calculated to summarize PP characteristics. Medians and  
584 interquartile ranges (IQR) were calculated for continuous variables and were compared across  
585 sites by Kruskal-Wallis test. Frequencies and percentages were calculated for categorical  
586 variables and were compared with the chi-square test. Significant differences are noted.

587 Mean outcomes for Aims 1 and 2 over time and by program were analyzed using  
588 longitudinal linear mixed modeling [78,79] to account for the repeated measure effects, as well  
589 as to adjust for patient participant demographic characteristics. To adjust for potential differences  
590 in the program populations, we adjusted for potential confounding covariates identified *a priori*  
591 including patient participant gender, age, education, CAHPS CC A&B. Patient participant-  
592 Provider Communication, F. Equitable treatment, G. Trust, and H. Interpreter Services (used  
593 during a patient-provider visit); Income-to-Federal poverty level ratio, BMI, social support  
594 diabetes knowledge (DKQ-23), and social support activation (PAM-10), as well as interactions  
595 of each of these variables with time and with program. Secondary outcomes were also adjusted  
596 for patient diabetes knowledge (DKQ-23), patient activation (PAM-10), and depression (PHQ-  
597 9), except when PHQ-9 was the outcome, as well as all interactions with both time and program,  
598 since knowledge, activation, and depression can affect behavior and influence the secondary  
599 outcomes. The interaction between time and program model was of primary interest to assess  
600 whether each outcome changed to different extents over time by program. Covariates that were  
601 excluded because of their strong relationship with site included primary language and type of  
602 insurance. The models used an unstructured covariance over time. The full models were fit and  
603 then reduced with backward model selection using conditional Akaike information criterion  
604 (cAIC)] Model fit assumptions on the residuals were equal variance and normality, which were  
605 both assessed visually. However, results were robust to violations of model distributional  
606 assumption. Analyses were performed in R 4.1.0. The restricted maximum-likelihood (REML)  
607 adjusted least-squares mean difference estimate of the outcome between programs from baseline  
608 to 6 months is reported along with its 95% confidence interval. The difference estimate from  
609 baseline to 12 months is also reported.

610 Exploratory, post-hoc subgroup analyses summarized longitudinal changes for each  
611 outcome (PAM, A1c, PHQ-9, and BMI) by program first by each outcome's categories, then  
612 with respect to the categories of A1c.

613 We conducted an analysis to assess patient participant capacity for diabetes self-  
614 management, our primary patient-reported outcome, by measuring diabetes knowledge using the  
615 DKQ and patient activation using the PAM-10 (described above). Descriptive statistics including  
616 means, standard deviations, medians, and quartiles were calculated for each outcome measure.  
617 Diabetes self-management program models were compared for the CCM vs the DSMS. P-values  
618 were compared to a Bonferroni-corrected  $\alpha = 0.025$  to account for multiple comparisons (two  
619 primary outcome measures). The primary outcome analyses were:

- 620 1. Improvement in diabetes knowledge: Primary analysis used the DKQ summed score.
- 621 2. Improvement in diabetes-related “patient activation”: Primary analysis used the PAM-10  
622 raw score. We also converted raw scores to scaled scores per a proprietary algorithm [80]  
623 and then grouped them into patient activation levels which are displayed descriptively  
624 (frequencies and percentages) by diabetes self-management program model.

625  
626 For our secondary outcome, successful patient participant management of their diabetes,  
627 we measured their A1c from blood samples drawn, PHQ-9 depression scores, and BMI  
628 calculations. The modeling used the longitudinal mixed model with the additional covariates of  
629 DKQ and PAM-10 for all three secondary outcomes and also PHQ-9 for A1c and BMI.  
630 Difference estimates are reported along with their 98.3% confidence intervals (the significance  
631 level includes a Bonferroni adjustment for three secondary outcomes).

632 As part of our characterization of programmatic interface with patient participant culture  
633 and socio-economic circumstances (Aim #3), we summarized patient participant and social  
634 support participant scores on five of the eight subscales of the Consumer Assessment of  
635 Healthcare Providers and Systems Cultural Competence Set (CAHPS-CC) (Domains A. and B.,  
636 F., G., and H.) aggregated over the three follow-up timepoints and treated as a fixed covariate to  
637 assess the overall program experience. Medians and quartiles of the subscales by diabetes self-  
638 management program model were reported. Social support participant scores were combined  
639 with the patient participant scores and used as covariates in the analysis for the quantitative  
640 primary and secondary outcome measures.

641 Poverty and gender were included as covariates in the longitudinal modeling of the  
642 primary and secondary outcome variables to assess effects due to differences in poverty.  
643 Furthermore, we also assessed poverty status for potential heterogeneity of treatment effect using

644 a separate model that included only poverty (categorical: <FPL versus  $\geq$  FPL to 250% FPL),  
645 gender, and language as covariates.

646

## 647 **Results**

### 648 **Sample**

649 We enrolled 452 (226 dyads of patient participants and social support participants) in the  
650 study: 120 dyads from the DSMS and 106 from the CCM). The CONSORT diagram shows the  
651 study flow from eligibility through the 12-month assessment (Fig 2). At recruitment, 58 patient  
652 participants were ineligible. The primary reasons were: no social support participant available to  
653 participate with them (n=19), already had begun the program (n=17), and income was above  
654 250% of FPL (*i.e.*, not low-income) (n=12). We also had 84 people decline to participate. The  
655 primary reasons were: did not respond to contact call (n=28), not interested (n=18), and too busy  
656 (n=14). We enrolled more patient participants (n=120) from CDE than from One Hope (n=106),  
657 but at each site, we enrolled and retained enough patient participants to power the study (Fig 2).

658 Eight patient participants (3.5%) and 20 social support participants (8.8%) left the study.  
659 Attrition was not equal, with more leaving from UNM-CDE, but given the low attrition rate  
660 overall and at both sites, this was not considered a source of bias in interpreting the study  
661 findings. The primary reason for leaving was lack of time. Patient participants were eligible to  
662 stay in the study even if their social support participant partner left. However, social support  
663 participants were not allowed to stay in the study if their patient participant partner left. Included  
664 in the 20 social support participants who left were the eight whose patient participants left.

665

### 666 **Descriptive Baseline Statistics**

667

#### 668 **Demographics**

669 The majority of participants were female (72.6%) (Table 1a). Response options for the  
670 demographic question about gender were “male/female/other.” One participant identified their  
671 gender as “other.” In an interview conducted with this participant, she self-identified as a trans  
672 woman (assigned male at birth) who has not opted to initiate medication or surgical intervention  
673 for gender dysphoria. In research that is survey-based and self-report, there is movement to count

674 trans individuals as the gender with which they self-identify, but in research dealing with  
675 biology/physiology, there is precedent for dropping them from the analysis. This project gathered  
676 both survey and biological data. We made a conscious decision not to exclude this one individual  
677 from the analysis, as that would align with the binary gender tradition in research that reflects  
678 and contributes to social and political dynamics that make transgender individuals invisible.  
679 Because we would like to honor this participant's gender, as she states, we present gender as a  
680 non-binary variable both out of respect and to represent her in the research as she represents  
681 herself. However, for statistical purposes, rather than dropping her from the analysis, she was  
682 coded as "male." We made this decision because she was diagnosed with diabetes long before  
683 publicly self-identifying as a trans woman and she has not made any physiological changes.  
684 Therefore, we hypothesized that her diabetes-related biology would be more in alignment with  
685 male physiology than female.

686         The majority of participants were married (57.5%) and reported speaking Spanish as the  
687 only language at home (58.4%) (Table 1a). The median age of the patient participants was 51.9  
688 (IQR bounds: 45.3 to 60.3) years. The household size was fairly evenly distributed among living  
689 alone or having one to four other household members (range: 15%-23%). Nearly one-half  
690 (49.6%) did not graduate from high school. The majority of participants self-rated their health as  
691 either "good" (44.4%) or "fair" (32.9%) (Table 1b).

692         Compared to patients in the DSMS, patients in the CCM were significantly younger (49.5  
693 vs 55.2), slightly more likely to be male (34% vs 21%), more likely to be partnered or married  
694 (67.9% vs 48.3%), and less likely to have graduated from high school (73.5% vs 28.3%) (Table  
695 1a). CCM patients were also significantly more likely to only speak Spanish at home (97.2% vs  
696 24.2%), less likely to prefer to speak English if they speak both Spanish and English at home  
697 (0% vs 82.7%), and less likely to speak English well if they do not speak English at home  
698 (15.4% vs 72.3%). CCM patients had much lower income-to-FPL ratios (0.54 vs 0.94) and were  
699 more likely to live no higher than FPL (85.8% vs 55.0%) (Table 1b).

700

701 Table 1a. Baseline patient participant demographics (continued in Table 1b).

| Demographic                                                            | All Patient<br>Participants | Program                        |                                | P <sup>a</sup>                 |                    |
|------------------------------------------------------------------------|-----------------------------|--------------------------------|--------------------------------|--------------------------------|--------------------|
|                                                                        |                             | CCM                            | DSMS                           |                                |                    |
|                                                                        | (N<br>=)                    | (N=226)                        | (N=106)                        | (N=120)                        |                    |
|                                                                        |                             | Median [Q1;<br>Q3]<br>or n (%) | Median [Q1;<br>Q3]<br>or n (%) | Median [Q1;<br>Q3]<br>or n (%) |                    |
| Age in years                                                           | 22                          | 51.9<br>[45.3;60.3]            | 49.5<br>[44.2;54.6]            | 55.2<br>[47.7;62.9]            | 0.001              |
| Do you identify as male,<br>female or other?                           | 22                          |                                |                                |                                | 0.055 <sup>b</sup> |
| - Female                                                               | 6                           | 164 (72.6%)                    | 70 (66.0%)                     | 94 (78.3%)                     |                    |
| - Male                                                                 |                             | 61 (27.0%)                     | 36 (34.0%)                     | 25 (20.8%)                     |                    |
| - Other                                                                |                             | 1 ( 0.4%)                      | 0 ( 0.0%)                      | 1 ( 0.8%)                      |                    |
| Marital Status                                                         | 22                          |                                |                                |                                | 0.005              |
| - Single/Separated/<br>Divorced/Widowed                                | 6                           | 96 (42.5%)                     | 34 (32.1%)                     | 62 (51.7%)                     |                    |
| - Partnered/Married                                                    |                             | 130 (57.5%)                    | 72 (67.9%)                     | 58 (48.3%)                     |                    |
| How many people<br>currently live with you<br>(not counting yourself)? | 22                          |                                |                                |                                | <0.000             |
| - 0                                                                    | 6                           | 44 (19.5%)                     | 6 ( 5.7%)                      | 38 (31.7%)                     | 5                  |
| - 1                                                                    |                             | 52 (23.0%)                     | 21 (19.8%)                     | 31 (25.8%)                     |                    |
| - 2                                                                    |                             | 36 (15.9%)                     | 19 (17.9%)                     | 17 (14.2%)                     |                    |
| - 3                                                                    |                             | 42 (18.6%)                     | 24 (22.6%)                     | 18 (15.0%)                     |                    |
| - 4                                                                    |                             | 34 (15.0%)                     | 22 (20.8%)                     | 12 (10.0%)                     |                    |
| - 5+                                                                   |                             | 18 ( 8.0%)                     | 14 (13.2%)                     | 4 ( 3.3%)                      |                    |
| Number of people in<br>household (including<br>yourself)               | 22                          |                                |                                |                                | <0.000             |
| Highest level of<br>education                                          | 6                           | 3.0 [ 2.0; 4.0]                | 4.0 [ 2.0; 5.0]                | 2.0 [ 1.0; 4.0]                | 5                  |
| - 8th Grade or lower                                                   | 22                          | 80 (35.4%)                     | 61 (57.5%)                     | 19 (15.8%)                     | <0.000             |
| - Some High School                                                     | 6                           | 32 (14.2%)                     | 17 (16.0%)                     | 15 (12.5%)                     | 5                  |
| - High School or equiv.<br>- Some college,<br>Associate                |                             | 46 (20.4%)                     | 15 (14.2%)                     | 31 (25.8%)                     |                    |
| - Bachelor's or higher                                                 |                             | 52 (23.0%)                     | 12 (11.3%)                     | 40 (33.3%)                     |                    |
|                                                                        |                             | 16 ( 7.1%)                     | 1 ( 0.9%)                      | 15 (12.5%)                     |                    |

702 Note: IQR bounds [Q1, Q3] are 25th and 75th percentiles.

703 <sup>a</sup>P-values reported from the Kruskal-Wallis test for continuous data, and from the chi-square test with  
704 continuity correction for categorical data.

705 <sup>b</sup>For statistical purposes, for the gender variable the one "Other" response was grouped with male, as  
706 described above.

707 Initialisms: Diabetes Self-management support empowerment model (DSMS), Chronic care model (CCM).

708



709 Table 1b. Baseline patient participant demographics (continued from Table 1a).

| Demographic                                                                              | All Patient<br>Participants    | Program                        |                                | P <sup>a</sup>       |
|------------------------------------------------------------------------------------------|--------------------------------|--------------------------------|--------------------------------|----------------------|
|                                                                                          |                                | CCM                            | DSMS                           |                      |
|                                                                                          | (N<br>=)                       | (N=106)                        | (N=120)                        |                      |
|                                                                                          | Median [Q1;<br>Q3]<br>or n (%) | Median [Q1;<br>Q3]<br>or n (%) | Median [Q1;<br>Q3]<br>or n (%) |                      |
| What language(s) do you<br>speak at home?                                                | 22<br>6                        |                                |                                | <0.0005 <sup>b</sup> |
| - Spanish and English                                                                    | 51 (22.6%)                     | 1 ( 0.9%)                      | 50 (41.7%)                     |                      |
| - Spanish, only                                                                          | 133 (58.8%)                    | 104 (98.1%)                    | 29 (24.2%)                     |                      |
| - English, only                                                                          | 41 (18.1%)                     | 1 ( 0.9%)                      | 40 (33.3%)                     |                      |
| - Other                                                                                  | 1 ( 0.4%)                      | 0 ( 0.0%)                      | 1 ( 0.8%)                      |                      |
| - None                                                                                   | 0 ( 0.0%)                      | 0 ( 0.0%)                      | 0 ( 0.0%)                      |                      |
| If you speak both<br>Spanish and English at<br>home, what is your<br>preferred language? | 56                             |                                |                                | 0.002                |
| - Spanish                                                                                | 13 (23.2%)                     | 4 (100.0%)                     | 9 (17.3%)                      |                      |
| - English                                                                                | 43 (76.8%)                     | 0 ( 0.0%)                      | 43 (82.7%)                     |                      |
| If you do not speak<br>English at home, how<br>well do you speak<br>English?             | 19<br>4                        |                                |                                | <0.0005              |
| - Excellent                                                                              | 42 (21.6%)                     | 0 ( 0.0%)                      | 42 (46.7%)                     |                      |
| - Well                                                                                   | 39 (20.1%)                     | 16 (15.4%)                     | 23 (25.6%)                     |                      |
| - Poorly                                                                                 | 113 (58.2%)                    | 88 (84.6%)                     | 25 (27.8%)                     |                      |
| General health                                                                           | 22<br>5                        |                                |                                | 0.001                |
| - Excellent                                                                              | 35 (15.6%)                     | 12 (11.3%)                     | 23 (19.3%)                     |                      |
| - Good                                                                                   | 100 (44.4%)                    | 54 (50.9%)                     | 46 (38.7%)                     |                      |
| - Fair                                                                                   | 74 (32.9%)                     | 39 (36.8%)                     | 35 (29.4%)                     |                      |
| - Poor                                                                                   | 16 ( 7.1%)                     | 1 ( 0.9%)                      | 15 (12.6%)                     |                      |
| Annual Income, \$USD                                                                     | 13277<br>22 [9131;20871<br>6 ] | 13045<br>[8522;18262]          | 14610<br>[9819.0;2500<br>0]    | 0.016                |
| Income-to-Federal<br>poverty level ratio                                                 | 22 0.763<br>6 [0.400;1.108]    | 0.544<br>[0.355;0.859]         | 0.944<br>[0.519;1.467]         | <0.0005              |
| Income greater than<br>Federal poverty level<br>indicator                                | 22<br>6                        |                                |                                | <0.0005              |
| - ≤ Fed Poverty Level                                                                    | 157 (69.5%)                    | 91 (85.8%)                     | 66 (55.0%)                     |                      |
| - > Fed Poverty Level                                                                    | 69 (30.5%)                     | 15 (14.2%)                     | 54 (45.0%)                     |                      |

710 Note: IQR bounds [Q1, Q3] are 25th and 75th percentiles.

711 <sup>a</sup>P-values reported from the Kruskal-Wallis test for continuous and from the chi-square test with continuity  
712 correction for categorical data.

713 <sup>b</sup>Based on the first three rows.  
714 Initialisms: Diabetes Self-management support empowerment model (DSMS), Chronic care model (CCM).

715

## 716 **Physiological characteristics**

717 Patient participants were split between those who entered with pre-diabetes (42.2%) and  
718 diabetes (57.8%), with the median time since diagnosis of their current diabetes category 1.6  
719 years (Table 2a). Some patient participants had recently tested in the pre-diabetes range which  
720 was why their provider had referred them to a program but between diagnosis and when they  
721 began the program, some made lifestyle changes such that when we drew blood samples for A1c  
722 at baseline, they were below the range for prediabetes. We did not exclude them from the study  
723 because the A1c analysis conducted as part of our baseline because we were not using an A1c  
724 test to screen for enrollment.

725 Median baseline A1c was 6.6, with 33.3% of those with diabetes having A1c over 10.  
726 Median BMI was 32.7 (Table 2a). The vast majority reported a family member with diabetes  
727 (81.6%), were taking some type of medication (75.1%), and that their social support participant  
728 partner was helpful to them in managing their diabetes (90.7%).

729 Patient participants at both sites had comparable median A1c values (CCM 6.5% vs  
730 DSMS 6.7%) with a similar distribution over A1c diabetes ranges of pre-diabetes and diabetes,  
731 and similar median BMI (31.2 vs 33.6) (Table 2a). The majority in both programs were above  
732 normal BMI compared to norms for American adults--between 18.5 and 24.9. For CCM, 61%  
733 and for DSMS, 90% were obese. There were differences between PPs in the CCM and those in  
734 the DSMS on variables such as entering the program with diabetes, time since diagnosis, taking  
735 medications for diabetes, adhering to the medication prescription, and the importance of the  
736 social support in managing the disease.

## 737 **Capacity for diabetes self-management**

738 All patient participants generally scored low on diabetes knowledge (DKQ), with an  
739 average score of 14/23, and compared to DSMS, patient participants in CCM scored lower by  
740 two points (13 vs 15) (Table 2b). However, these values were consistent with baseline  
741 assessments of similar populations.

742 The average PAM-10 score was 77.3, with 96% scoring at Level 3 (taking action) or 4  
743 (maintaining behaviors/pushing further) (Table 2b). PPs in CCM compared to patient

744 participants in DSMS scored higher by four points with more patient participants at Level 4  
745 (72.6% vs 55.0%) and with fewer at Level 1 (disengaged/overwhelmed) and Level 2 (becoming  
746 aware, but struggling) (1.8% vs 5.8%).

747

748

749 Table 2a. Baseline diabetes, BMI, Diabetes knowledge, and patient activation characteristics  
 750 (continued in Table 2b).

| Diabetes                                                                                                                                        | (N=) | All Patient<br>Participants<br>(N=226)<br>Median [Q1;<br>Q3]<br>or n (%) | Program                                          |                                                   | P <sup>a</sup> |
|-------------------------------------------------------------------------------------------------------------------------------------------------|------|--------------------------------------------------------------------------|--------------------------------------------------|---------------------------------------------------|----------------|
|                                                                                                                                                 |      |                                                                          | CCM<br>(N=106)<br>Median [Q1;<br>Q3]<br>or n (%) | DSMS<br>(N=120)<br>Median [Q1;<br>Q3]<br>or n (%) |                |
| Diabetes diagnosis                                                                                                                              | 218  |                                                                          |                                                  |                                                   | 0.011          |
| - Pre-diabetes                                                                                                                                  |      | 92 (42.2%)                                                               | 52 (52.0%)                                       | 40 (33.9%)                                        |                |
| - Diabetes                                                                                                                                      |      | 126 (57.8%)                                                              | 48 (48.0%)                                       | 78 (66.1%)                                        |                |
| Time since diagnosis (years)                                                                                                                    | 214  | 1.55 [0.08;8.01]                                                         | 1.00 [0.08;4.00]                                 | 2.00 [0.08;12.01]                                 | 0.028          |
| Baseline A1c                                                                                                                                    | 211  | 6.6 [ 6.0; 9.3]                                                          | 6.5 [ 5.9; 8.8]                                  | 6.7 [ 6.0; 9.4]                                   | 0.347          |
| A1c Categories                                                                                                                                  | 211  |                                                                          |                                                  |                                                   | 0.636          |
| - Neither                                                                                                                                       |      | 14 ( 6.6%)                                                               | 8 ( 7.5%)                                        | 6 ( 5.7%)                                         |                |
| - Pre-diabetes                                                                                                                                  |      | 77 (36.5%)                                                               | 41 (38.7%)                                       | 36 (34.3%)                                        |                |
| - Diabetes                                                                                                                                      |      | 120 (56.9%)                                                              | 57 (53.8%)                                       | 63 (60.0%)                                        |                |
| Body mass index (BMI)                                                                                                                           | 226  | 32.7 [29.2;36.9]                                                         | 31.3 [28.2;36.4]                                 | 33.8 [30.1;37.1]                                  | 0.036          |
| Body mass index (BMI)<br>Categories                                                                                                             | 226  |                                                                          |                                                  |                                                   | 0.041          |
| - Underweight                                                                                                                                   |      | 2 ( 0.9%)                                                                | 0 ( 0.0%)                                        | 2 ( 1.7%)                                         |                |
| - Normal or Healthy Weight                                                                                                                      |      | 21 ( 9.3%)                                                               | 11 (10.4%)                                       | 10 ( 8.3%)                                        |                |
| - Overweight                                                                                                                                    |      | 48 (21.2%)                                                               | 30 (28.3%)                                       | 18 (15.0%)                                        |                |
| - Obese                                                                                                                                         |      | 155 (68.6%)                                                              | 65 (61.3%)                                       | 90 (75.0%)                                        |                |
| Are you currently taking any<br>medications for diabetes, any<br>of the conditions you just<br>mentioned, or for anything<br>else? <sup>b</sup> | 213  |                                                                          |                                                  |                                                   | <0.0005        |
| - Yes                                                                                                                                           |      | 160 (75.1%)                                                              | 61 (62.9%)                                       | 99 (85.3%)                                        |                |
| - No                                                                                                                                            |      | 53 (24.9%)                                                               | 36 (37.1%)                                       | 17 (14.7%)                                        |                |
| Are you taking your<br>medication(s) as prescribed?                                                                                             | 156  |                                                                          |                                                  |                                                   | 0.031          |
| - Yes                                                                                                                                           |      | 132 (84.6%)                                                              | 56 (93.3%)                                       | 76 (79.2%)                                        |                |
| - No                                                                                                                                            |      | 24 (15.4%)                                                               | 4 ( 6.7%)                                        | 20 (20.8%)                                        |                |
| Have your (biological) family<br>members been diagnosed<br>with diabetes?                                                                       | 223  |                                                                          |                                                  |                                                   | 0.301          |
| - Yes                                                                                                                                           |      | 182 (81.6%)                                                              | 90 (84.9%)                                       | 92 (78.6%)                                        |                |
| - No                                                                                                                                            |      | 41 (18.4%)                                                               | 16 (15.1%)                                       | 25 (21.4%)                                        |                |

751 Note: IQR bounds [Q1, Q3] are 25th and 75th percentiles.

752 <sup>a</sup>P-values reported from the Kruskal-Wallis test for continuous and from the chi-square test with continuity  
 753 correction for categorical data.

754 <sup>b</sup>Medications were not reported separately for diabetes versus other conditions.

755 Initialisms: Diabetes Self-management support empowerment model (DSMS), Chronic care model (CCM).

756 Table 2b. Baseline diabetes, BMI, Diabetes knowledge, and patient activation characteristics  
 757 (continued from Table 2a).

| Diabetes                                                                               | (N=) | All Patient<br>Participants<br>(N=226)<br>Median [Q1;<br>Q3]<br>or n (%) | Program                                          |                                                   | P <sup>a</sup> |
|----------------------------------------------------------------------------------------|------|--------------------------------------------------------------------------|--------------------------------------------------|---------------------------------------------------|----------------|
|                                                                                        |      |                                                                          | CCM<br>(N=106)<br>Median [Q1;<br>Q3]<br>or n (%) | DSMS<br>(N=120)<br>Median [Q1;<br>Q3]<br>or n (%) |                |
| DKQ-23 Score                                                                           | 226  | 14.0<br>[12.0;16.0]<br>77.3                                              | 13.0<br>[11.0;15.0]<br>79.2                      | 15.0<br>[14.0;17.0]<br>75.5                       | <0.0005        |
| PAM-10 Score                                                                           | 226  | [68.9;90.2]                                                              | [72.1;90.2]                                      | [65.8;83.7]                                       | 0.018          |
| PAM-10 Level                                                                           | 226  |                                                                          |                                                  |                                                   | 0.042          |
| - Level 1: Disengaged and<br>overwhelmed                                               |      | 5 ( 2.2%)                                                                | 1 ( 0.9%)                                        | 4 ( 3.3%)                                         |                |
| - Level 2: Becoming aware, but still<br>struggling                                     |      | 4 ( 1.8%)                                                                | 1 ( 0.9%)                                        | 3 ( 2.5%)                                         |                |
| - Level 3: Taking action                                                               |      | 74 (32.7%)                                                               | 27 (25.5%)                                       | 47 (39.2%)                                        |                |
| - Level 4: Maintaining behaviours<br>and pushing further                               |      | 143 (63.3%)                                                              | 77 (72.6%)                                       | 66 (55.0%)                                        |                |
| <b>PAM, additional questions</b>                                                       |      |                                                                          |                                                  |                                                   |                |
| My social support is an<br>important part of managing<br>my condition.                 | 225  |                                                                          |                                                  |                                                   | 0.045          |
| - Strongly agree                                                                       |      | 175 (77.8%)                                                              | 90 (84.9%)                                       | 85 (71.4%)                                        |                |
| - Somewhat agree                                                                       |      | 29 (12.9%)                                                               | 9 ( 8.5%)                                        | 20 (16.8%)                                        |                |
| - Neutral                                                                              |      | 11 ( 4.9%)                                                               | 2 ( 1.9%)                                        | 9 ( 7.6%)                                         |                |
| - Somewhat disagree                                                                    |      | 4 ( 1.8%)                                                                | 3 ( 2.8%)                                        | 1 ( 0.8%)                                         |                |
| - Strongly disagree                                                                    |      | 6 ( 2.7%)                                                                | 2 ( 1.9%)                                        | 4 ( 3.4%)                                         |                |
| [My program] provides me<br>with tools and resources to<br>better manage my condition. | 226  |                                                                          |                                                  |                                                   | <0.0005        |
| - Strongly agree                                                                       |      | 139 (61.5%)                                                              | 87 (82.1%)                                       | 52 (43.3%)                                        |                |
| - Somewhat agree                                                                       |      | 32 (14.2%)                                                               | 8 ( 7.5%)                                        | 24 (20.0%)                                        |                |
| - Neutral                                                                              |      | 52 (23.0%)                                                               | 10 ( 9.4%)                                       | 42 (35.0%)                                        |                |
| - Somewhat disagree                                                                    |      | 2 ( 0.9%)                                                                | 0 ( 0.0%)                                        | 2 ( 1.7%)                                         |                |
| - Strongly disagree                                                                    |      | 1 ( 0.4%)                                                                | 1 ( 0.9%)                                        | 0 ( 0.0%)                                         |                |

758 Note: IQR bounds [Q1, Q3] are 25th and 75th percentiles.

759 <sup>a</sup>P-values reported from the Kruskal-Wallis test for continuous and from the chi-square test with continuity  
 760 correction for categorical data.

761 <sup>\*</sup>CAHPS-CC not measured at baseline, only at follow-up; these values appear in a later table.

762 Initialisms: Diabetes Self-management support empowerment model (DSMS), Chronic care model (CCM),

763 Diabetes knowledge questionnaire (DKQ-23), Patient activation measure (PAM-10).

764

765 **Depression**

766 More than half (52.2%) of the patient participants ranked as having symptoms of  
 767 depression, with 22.2% in the “Moderate,” “Moderately Severe,” or “Severe” categories (Table  
 768 3). More than half in either program scored as having mild to severe depression although a  
 769 higher percentage of subjects in DSMS tested for moderately severe to severe depression  
 770 (11.7%) compared to CCM (3.8%).

771

772 Table 3. Baseline depression characteristics.

| Depression                               | All Patient<br>Participants<br>(N=) | Program                       |                               | P <sup>a</sup> |
|------------------------------------------|-------------------------------------|-------------------------------|-------------------------------|----------------|
|                                          |                                     | CCM<br>(N=106)                | DSMS<br>(N=120)               |                |
|                                          | Median [Q1;<br>Q3<br>or n (%)       | Median [Q1;<br>Q3<br>or n (%) | Median [Q1;<br>Q3<br>or n (%) |                |
| PHQ-9 Depression Severity Total<br>Score | 226                                 | 5.0 [ 2.0; 9.0]               | 5.0 [ 2.0; 7.0]               | 0.215          |
| Depression, log <sub>2</sub> (PHQ-9 + 2) | 226                                 | 2.8 [ 2.0; 3.5]               | 2.8 [ 2.0; 3.2]               | 0.215          |
| PHQ-9 Depression Severity<br>categories  | 226                                 |                               |                               | 0.057          |
| - None-minimal (0 – 4)                   | 108 (47.8%)                         | 52 (49.1%)                    | 56 (46.7%)                    |                |
| - Mild (5 – 9)                           | 68 (30.1%)                          | 38 (35.8%)                    | 30 (25.0%)                    |                |
| - Moderate (10 – 14)                     | 32 (14.2%)                          | 12 (11.3%)                    | 20 (16.7%)                    |                |
| - Moderately Severe (15 – 19)            | 13 ( 5.8%)                          | 4 ( 3.8%)                     | 9 ( 7.5%)                     |                |
| - Severe (20 – 27)                       | 5 ( 2.2%)                           | 0 ( 0.0%)                     | 5 ( 4.2%)                     |                |

773 Note: IQR bounds [Q1, Q3] are 25th and 75th percentiles.

774 <sup>a</sup>P-values reported from the Kruskal-Wallis test for continuous and from the chi-square test with continuity  
 775 correction for categorical data.

776 Initialisms: Diabetes Self-management support empowerment model (DSMS), Chronic care model (CCM),  
 777 Depression severity (PHQ-9).

778

779 **Selected environmental and comorbid conditions**

780 The three most commonly reported comorbid conditions reported were hypertension  
 781 (28.3%), high cholesterol (16.4%), and a thyroid condition (13.7%) (Table 4). Rates for  
 782 hypertension between patient participants in the two programs were similar; however, CCM  
 783 patient participants were less likely to have any comorbid condition (41.5% vs. 70.0%) and had  
 784 fewer comorbid conditions reported (Q1-Q3: 0-1 vs. 0-3).

785

786 Table 4. Environmental and Comorbid selected characteristics. Rare comorbid conditions  
 787 excluded from table.

| Comorbidities                                              | (N=) | Program                                                                  |                                                  |                                                   | P <sup>a</sup> |
|------------------------------------------------------------|------|--------------------------------------------------------------------------|--------------------------------------------------|---------------------------------------------------|----------------|
|                                                            |      | All Patient<br>Participants<br>(N=226)<br>Median [Q1;<br>Q3]<br>or n (%) | CCM<br>(N=106)<br>Median<br>[Q1; Q3]<br>or n (%) | DSMS<br>(N=120)<br>Median<br>[Q1; Q3]<br>or n (%) |                |
| Do you smoke?                                              | 224  | 32 (14.3%)                                                               | 9 (8.6%)                                         | 23 (19.3%)                                        | 0.035          |
| Does anyone in your household smoke?                       | 224  | 46 (20.5%)                                                               | 14 (13.3%)                                       | 32 (26.9%)                                        | 0.019          |
| Have you been diagnosed with other diseases or conditions? | 225  | 129 (57.3%)                                                              | 44 (41.9%)                                       | 85 (70.8%)                                        | <0.000         |
| Number of comorbid conditions reported                     | 226  | 1.0 [ 0.0; 2.0]                                                          | 0.0 [ 0.0; 1.0]                                  | 1.0 [ 0.0; 3.0]                                   | <0.000         |
| At least one comorbid condition reported                   | 226  | 128 (56.6%)                                                              | 44 (41.5%)                                       | 84 (70.0%)                                        | <0.000         |
| Comorbid conditions reported                               |      |                                                                          |                                                  |                                                   |                |
| Hypertension                                               | 226  | 64 (28.3%)                                                               | 24 (22.6%)                                       | 40 (33.3%)                                        | 0.103          |
| High cholesterol                                           | 226  | 37 (16.4%)                                                               | 10 (9.4%)                                        | 27 (22.5%)                                        | 0.014          |
| Thyroid condition                                          | 226  | 31 (13.7%)                                                               | 9 (8.5%)                                         | 22 (18.3%)                                        | 0.051          |
| Mental health condition                                    | 226  | 13 (5.8%)                                                                | 1 (0.9%)                                         | 12 (10.0%)                                        | 0.008          |
| Arthritis                                                  | 226  | 17 (7.5%)                                                                | 3 (2.8%)                                         | 14 (11.7%)                                        | 0.024          |
| Asthma                                                     | 226  | 11 (4.9%)                                                                | 1 (0.9%)                                         | 10 (8.3%)                                         | 0.023          |
| Nerve damage and or neuropathy                             | 226  | 9 (4.0%)                                                                 | 0 (0.0%)                                         | 9 (7.5%)                                          |                |
| Heart condition                                            | 226  | 9 (4.0%)                                                                 | 3 (2.8%)                                         | 6 (5.0%)                                          |                |
| Cancer                                                     | 226  | 9 (4.0%)                                                                 | 3 (2.8%)                                         | 6 (5.0%)                                          |                |
| Acid reflux                                                | 226  | 8 (3.5%)                                                                 | 2 (1.9%)                                         | 6 (5.0%)                                          |                |
| Fibromyalgia                                               | 226  | 8 (3.5%)                                                                 | 0 (0.0%)                                         | 8 (6.7%)                                          |                |
| Sleep apnea                                                | 226  | 8 (3.5%)                                                                 | 1 (0.9%)                                         | 7 (5.8%)                                          |                |
| PTSD                                                       | 226  | 5 (2.2%)                                                                 | 0 (0.0%)                                         | 5 (4.2%)                                          |                |
| Kidney disease                                             | 226  | 4 (1.8%)                                                                 | 0 (0.0%)                                         | 4 (3.3%)                                          |                |
| Lupus                                                      | 226  | 4 (1.8%)                                                                 | 0 (0.0%)                                         | 4 (3.3%)                                          |                |
| Other <sup>b</sup>                                         | 226  | 25 (11.1%)                                                               | 7 (6.6%)                                         | 18 (15.0%)                                        |                |

788 Note: IQR bounds [Q1, Q3] are 25th and 75th percentiles.

789 <sup>a</sup>P-values reported from the Kruskal-Wallis test for continuous and from the chi-square test with continuity  
 790 correction for categorical data.

791 <sup>b</sup>Comorbid "Other" includes 42 additional conditions.

792 Initialisms: Diabetes Self-management support empowerment model (DSMS), Chronic care model (CCM).

793

794 **Social supports**

795           The most common social support participant relationship categories were family member  
796 other than spouse (42.5%) and spouse (27.9%) (Table 5a). Most patient participants reported  
797 daily interaction (65.9%) with the social support participants, primarily in-person (85.8%),  
798 although only slightly more than half live in the same household with their social support  
799 participant (Table 5b).

800



801 Table 5a. Patient Participants’ report on social support participant characteristics (continued in  
 802 Table 5b).

| Patient Participants About Their Social Support Participant                                          | All Patient Participants | Program     |            | P <sup>a</sup> |       |
|------------------------------------------------------------------------------------------------------|--------------------------|-------------|------------|----------------|-------|
|                                                                                                      |                          | (N=)        | (N=226)    |                | CCM   |
|                                                                                                      | (N=)                     | (N=226)     | (N=106)    | (N=120)        |       |
|                                                                                                      |                          | n (%)       | n (%)      | n (%)          |       |
| What is your relationship to your social support partner in this research project?                   | 226                      |             |            |                | 0.313 |
| - spouse                                                                                             |                          | 63 (27.9%)  | 33 (31.1%) | 30 (25.0%)     |       |
| - cohabitating partner/long-term partner                                                             |                          | 21 (9.3%)   | 8 (7.5%)   | 13 (10.8%)     |       |
| - family member                                                                                      |                          | 96 (42.5%)  | 39 (36.8%) | 57 (47.5%)     |       |
| - friend                                                                                             |                          | 40 (17.7%)  | 23 (21.7%) | 17 (14.2%)     |       |
| - neighbor or other                                                                                  |                          | 6 (2.7%)    | 3 (2.8%)   | 3 (2.5%)       |       |
| How involved is your social support partner in your diabetes management?                             | 226                      |             |            |                | 0.586 |
| - very                                                                                               |                          | 134 (59.3%) | 67 (63.2%) | 67 (55.8%)     |       |
| - somewhat                                                                                           |                          | 61 (27.0%)  | 25 (23.6%) | 36 (30.0%)     |       |
| - not very                                                                                           |                          | 24 (10.6%)  | 10 (9.4%)  | 14 (11.7%)     |       |
| - not at all                                                                                         |                          | 7 (3.1%)    | 4 (3.8%)   | 3 (2.5%)       |       |
| How often does your social support partner accompany you to appointments with your medical provider? | 226                      |             |            |                | 0.418 |
| - always                                                                                             |                          | 59 (26.1%)  | 30 (28.3%) | 29 (24.2%)     |       |
| - often                                                                                              |                          | 24 (10.6%)  | 12 (11.3%) | 12 (10.0%)     |       |
| - sometimes                                                                                          |                          | 73 (32.3%)  | 37 (34.9%) | 36 (30.0%)     |       |
| - never                                                                                              |                          | 70 (31.0%)  | 27 (25.5%) | 43 (35.8%)     |       |
| How much does your social support partner know about your health?                                    | 226                      |             |            |                | 0.634 |
| - a lot                                                                                              |                          | 151 (66.8%) | 68 (64.2%) | 83 (69.2%)     |       |
| - some                                                                                               |                          | 59 (26.1%)  | 29 (27.4%) | 30 (25.0%)     |       |
| - not much                                                                                           |                          | 15 (6.6%)   | 8 (7.5%)   | 7 (5.8%)       |       |
| - nothing                                                                                            |                          | 1 (0.4%)    | 1 (0.9%)   | 0 (0.0%)       |       |

803 Note: IQR bounds [Q1, Q3] are 25th and 75th percentiles.

804 <sup>a</sup>P-values reported from the Kruskal-Wallis test for continuous and from the chi-square test with continuity  
 805 correction for categorical data.

806 Initialisms: Diabetes Self-management support empowerment model (DSMS), Chronic care model (CCM).

807

808

809 Table 5b. Patient participants report on social support participant characteristics (continued from  
 810 Table 5a).

| Patient Participants About Their Social Support Participant      | All Patient Participants | Program    |            | P <sup>a</sup> |
|------------------------------------------------------------------|--------------------------|------------|------------|----------------|
|                                                                  |                          | CCM        | DSMS       |                |
|                                                                  | (N=)                     | (N=106)    | (N=120)    |                |
|                                                                  |                          | n (%)      | n (%)      |                |
| How often do you interact with your social support partner?      | 226                      |            |            | 0.043          |
| - more than once a day                                           | 41 (18.1%)               | 11 (10.4%) | 30 (25.0%) |                |
| - daily                                                          | 149 (65.9%)              | 77 (72.6%) | 72 (60.0%) |                |
| - weekly                                                         | 32 (14.2%)               | 16 (15.1%) | 16 (13.3%) |                |
| - monthly                                                        | 4 (1.8%)                 | 2 (1.9%)   | 2 (1.7%)   |                |
| How do you most often interact with your social support partner? | 226                      |            |            | 0.174          |
| - in-person                                                      | 194 (85.8%)              | 96 (90.6%) | 98 (81.7%) |                |
| - by phone call                                                  | 29 (12.8%)               | 10 (9.4%)  | 19 (15.8%) |                |
| - by text                                                        | 2 (0.9%)                 | 0 (0.0%)   | 2 (1.7%)   |                |
| - by social media or email                                       | 1 (0.4%)                 | 0 (0.0%)   | 1 (0.8%)   |                |
| Do you live with your social support partner?                    | 226                      |            |            | 0.420          |
| - Yes                                                            | 129 (57.1%)              | 64 (60.4%) | 65 (54.2%) |                |
| - No                                                             | 97 (42.9%)               | 42 (39.6%) | 55 (45.8%) |                |

811 Note: IQR bounds [Q1, Q3] are 25th and 75th percentiles.

812 <sup>a</sup>P-values reported from the Kruskal-Wallis test for continuous and from the chi-square test with continuity  
 813 correction for categorical data.

814 Initialisms: Diabetes Self-management support empowerment model (DSMS), Chronic care model (CCM).

815

816

817 The mean age for social support participants was 46.3 years and the majority were female  
 818 (64.6%) (Table 6). Educational attainment for social support participants was diverse, with  
 819 nearly one-third having completed 8<sup>th</sup> grade or lower, and nearly one-third having completed  
 820 high school or the equivalent (28.8%). Eighteen social supports (8.0%) had a bachelor’s degree  
 821 or higher. CCM social support participants were slightly more likely to be female (68.9% vs  
 822 60.8%). Educational attainment at the sites was somewhat different--nearly half of CCM social  
 823 support participants (45.3%) had only completed 8<sup>th</sup> grade or lower versus 16.7% for DSMS, and  
 824 CCM social support participants were less likely to have completed high school or the equivalent  
 825 (22.6% vs 34.2%), to have some college or an associate’s degree (15.1% vs 23.3%), or to have a  
 826 bachelor’s degree or higher (1.9% vs 13.3%).

827  
 828 Table 6. Social support demographic characteristics, diabetes knowledge scores, patient  
 829 activation, and overall *Consumer Assessment of Healthcare Providers and Systems Cultural*  
 830 *Competence Set (CAHPS-CC)* score.

| Social Support Participant Demographics   | All Social Support Participants<br>(N=226) | Program                     |                             | P <sup>a</sup> |
|-------------------------------------------|--------------------------------------------|-----------------------------|-----------------------------|----------------|
|                                           |                                            | CCM<br>(N=106)              | DSMS<br>(N=120)             |                |
|                                           | Median [Q1; Q3]<br>or n (%)                | Median [Q1; Q3]<br>or n (%) | Median [Q1; Q3]<br>or n (%) |                |
| Age in years                              | 46.3 [35.0;56.8]                           | 42.6 [32.5;52.6]            | 49.7 [36.2;61.0]            | 0.007          |
| Do you identify as male, female or other? |                                            |                             |                             | 0.224          |
| - Female                                  | 146 (64.6%)                                | 73 (68.9%)                  | 73 (60.8%)                  |                |
| - Male                                    | 78 (34.5%)                                 | 33 (31.1%)                  | 45 (37.5%)                  |                |
| - Other                                   | 2 ( 0.9%)                                  | 0 ( 0.0%)                   | 2 ( 1.7%)                   |                |
| Gender, binary for analysis               |                                            |                             |                             | 0.262          |
| - Female                                  | 146 (64.6%)                                | 73 (68.9%)                  | 73 (60.8%)                  |                |
| - Male                                    | 80 (35.4%)                                 | 33 (31.1%)                  | 47 (39.2%)                  |                |
| Highest level of education                |                                            |                             |                             | <0.0005        |
| - 8th Grade or lower                      | 68 (30.1%)                                 | 48 (45.3%)                  | 20 (16.7%)                  |                |
| - Some High School                        | 31 (13.7%)                                 | 16 (15.1%)                  | 15 (12.5%)                  |                |
| - High School or equiv.                   | 65 (28.8%)                                 | 24 (22.6%)                  | 41 (34.2%)                  |                |
| - Some college, Associate                 | 44 (19.5%)                                 | 16 (15.1%)                  | 28 (23.3%)                  |                |
| - Bachelor’s or higher                    | 18 ( 8.0%)                                 | 2 ( 1.9%)                   | 16 (13.3%)                  |                |
|                                           |                                            | 12.5                        | 14.0                        |                |
| SSP DKQ-23 Score                          | 14.0 [12.0;16.0]                           | [11.0;15.0]                 | [13.0;16.0]                 | <0.0005        |

|                                                            |                     |                     |                     |       |
|------------------------------------------------------------|---------------------|---------------------|---------------------|-------|
| SSP PAM-10 Score                                           | 75.5 [62.6;83.7]    | 75.5 [62.6;83.7]    | 77.3 [59.3;83.7]    | 0.909 |
| SSP PAM-10 Level                                           |                     |                     |                     | 0.172 |
| - Level 1: Disengaged and overwhelmed                      | 23 (10.2%)          | 8 ( 7.5%)           | 15 (12.5%)          |       |
| - Level 2: Becoming aware, but still struggling            | 9 ( 4.0%)           | 7 ( 6.6%)           | 2 ( 1.7%)           |       |
| - Level 3: Taking action                                   | 63 (27.9%)          | 31 (29.2%)          | 32 (26.7%)          |       |
| - Level 4: Maintaining behaviours and pushing further      | 131 (58.0%)         | 60 (56.6%)          | 71 (59.2%)          |       |
| CAHPS Cultural Competence: Social Support, quality of care | 0.917 [0.806;1.000] | 0.900 [0.818;1.000] | 0.971 [0.793;1.000] | 0.519 |

831 Note: IQR bounds [Q1, Q3] are 25th and 75th percentiles.

832 <sup>a</sup>P-values reported from the Kruskal-Wallis test for continuous and from the chi-square test with continuity  
833 correction for categorical data.

834 Initialisms: Diabetes Self-management support empowerment model (DSMS), Chronic care model (CCM), Diabetes  
835 knowledge questionnaire (DKQ-23), Patient Activation Measure (PAM), Consumer Assessment of Healthcare  
836 Providers and Systems Cultural Competence Set (CAHPS-CC).

## 837 **Qualitative Analysis**

838

### 839 **Coding of interviews and focus groups**

840 During Year 1, we conducted 11 provider interviews—five at CCM, six at CDE. During  
841 Years 1 and 2, we conducted eight focus groups (2/site/year) with a mix of 36 patient  
842 participants and social support participants, and 44 interviews with 23 unique patient participants  
843 (12 CCM, 11 CDE) and 21 unique social support participants (12 CCM, 9 CDE). In Year 1, we  
844 identified 42 Level I qualitative coding themes. After reviewing the themes and discussion, we  
845 selected themes that were well represented and fit with our line of inquiry. We used the themes  
846 to conduct Level II coding, rereading the transcripts and extracting quotations related to each of  
847 the six themes. We cleaned each quote, removing extraneous utterances, providing parenthetical  
848 contextual cues when appropriate, and ensured that the quotes were thematically relevant and  
849 broadly represented for both sites. For Level III coding, we united extractions created by all three  
850 team members and when appropriate, we sorted them into subthemes in order to achieve better  
851 internal thematic coherence.

852 For Aim #1, participant interviews and focus groups informed us about participant  
853 knowledge, activation, and motivation, and the barriers to both. For Aim #2, we learned about  
854 challenges to reducing A1c, making lifestyle changes (including eating—which impacts BMI),  
855 and mental health challenges related to reducing stress and depression. For Aim #3, from  
856 program staff interviews, we learned about the specifics of each program as discussed in the  
857 program assessment section below. From participant interviews and focus groups, we learned  
858 about the importance of social support and participant attitudes toward and experience with their  
859 program.

860

### 861 **Importance of social support**

862 Participants at both sites discussed the importance of social support in helping them deal  
863 with and manage their diabetes. Support was indicated to relate to having someone who was  
864 interested in their health and well-being, and “being there” for them was identified as an  
865 important motivator. Support related to food involved helping the patient participant shop for and  
866 prepare diabetes-appropriate food, helping them develop better food-related habits (such as not  
867 keeping chocolate or junk food in the house), monitoring what the patient participant was eating

868 or purchasing, helping them make rules or a plan for shopping and eating, scolding them if they  
 869 tried to break the “rules,” and having them watch educational programs about diabetes, about the  
 870 politics of the food system that contribute to disease, or about how bad junk food is for you. One  
 871 key thing that many social supports do is to change their own diet and eating habits in order to  
 872 support the patient participant in their struggle with diabetes. In addition, social support provided  
 873 by the programs was identified as very important.

874

## 875 **Motivations for change**

876 We identified things that motivate people to lifestyle changes (Table 7), including the  
 877 importance of being able to work, fear of illness or diabetes complications, and for the benefit of  
 878 others, especially children. While participants at both sites shared sentiments related to fear of  
 879 being unable to work, we noted a difference between the sites, with the participants at CCM  
 880 expressing more concern about what might happen if they were unable to work.

881

882 Table 7. Motivations for change.

|                                                |                                                                                                                                                                                                                                                                                                                                                                                                                              |
|------------------------------------------------|------------------------------------------------------------------------------------------------------------------------------------------------------------------------------------------------------------------------------------------------------------------------------------------------------------------------------------------------------------------------------------------------------------------------------|
| Importance of Work                             | “I am so afraid that if I stop working, I’ll become crippled.”                                                                                                                                                                                                                                                                                                                                                               |
|                                                | “Diabetes as an unexpected expense, things that you didn’t expect to spend on, but it’s for our own good”                                                                                                                                                                                                                                                                                                                    |
|                                                | You can’t work, you don’t have a life, you don’t have anything.”                                                                                                                                                                                                                                                                                                                                                             |
|                                                | “They don’t want to take pills. They don’t want to go to a doctor because it’s too expensive. They don’t have a job. I have the desire to do it and I am interested in having a healthy life. I want to live healthy for a long time and my life is work.”                                                                                                                                                                   |
| Fear of Illness/Symptoms                       | <b>“Sometimes I won’t finish my soda. I’ll just drink half of it and throw half of it away, because I’m thinking of the result if I did drink all that. I don’t want to get into a diabetic coma or get into any other medical issues.”</b>                                                                                                                                                                                  |
|                                                | <b>“...it was serious, because this time, it took some body parts. We know that we have to make the transition. We have no choice... they already got rid of all my toes...it’s going to have to come to the knee. Then, where does it stop?”</b>                                                                                                                                                                            |
| For the benefit of others, especially children | “I was concerned because I said maybe I won’t take care and they’ll cut my feet. That’s what am afraid of because if you don’t take care of yourself they can cut off your feet and that’s what I don’t want. How I am going to support myself. I don’t want to ask my children because they barely have for their own things, their water, their electricity and the young people nowadays want name brand clothing and no, |

|  |                                                                                                                                                                                                                                                                                                                                                                         |
|--|-------------------------------------------------------------------------------------------------------------------------------------------------------------------------------------------------------------------------------------------------------------------------------------------------------------------------------------------------------------------------|
|  | <p>no, no. I tell my children, don't give me anything, I don't need it. Because they barely have for themselves. I worried about that because I think how I am going to go to work. I have a lot of years and I worry and I say I need to do something."</p>                                                                                                            |
|  | <p>"It's very scary. You know why? Because I have babies, nine grandbabies. I always say, "If God is going to give me a long life, I would like to be healthy. I don't want to be a burden on my kids or my grandkids. I want to help them. Yeah, so I'm really striving to get off the pills. In order to do that, I need to bring down my A1c. It was very high."</p> |
|  | <p>"[If I] just make a change so that the grandkids, they won't notice that you changed their eating habits, so that it will be easier for them as they get older. Maybe that will help control their weight and hopefully lessen their [risk of getting diabetes]."</p>                                                                                                |
|  | <p><b>"Well, if I die, I'll be with the Lord, but that's selfish thinking, because I have family and they're the ones that keep me going, my grandkids and my boys. I just love them so much."</b></p>                                                                                                                                                                  |
|  | <p>"Since I was detected with pre-diabetes, I am watching what I eat, but everyone in the family, my children and all of us are eating the same...my oldest son said, "wow, we all have diabetes now."</p>                                                                                                                                                              |

883

884 **Understanding of/knowledge about diabetes**

885 We identified themes related to diabetes knowledge (Table 8). Some participants had  
 886 knowledge from personal experience with a family member. Many participants discussed having  
 887 a lack of knowledge or poor understanding of diabetes.

888

889 Table 8. Diabetes Knowledge as a Theme.

|                                                                                                                                                                                                                                                                            |
|----------------------------------------------------------------------------------------------------------------------------------------------------------------------------------------------------------------------------------------------------------------------------|
| <p>"To be honest I don't know how to deal with this. I don't know what are the symptoms. I don't know how it affects my health. I don't have a pattern to follow."</p>                                                                                                     |
| <p>"It's the ignorance, am sure everyone here knows people who are diabetics, but we don't know why how it affects and what are the consequences."</p>                                                                                                                     |
| <p>"That is something like I don't know how many carbohydrates, the chicken has protein. Honestly, I eat because I need to eat but not because I know how to balance or because it has these many minerals or this many proteins. To be honest I don't know anything."</p> |
| <p>"You are supposed to know what you eat. How am I going to know this? I just know that am hungry and I need to eat."</p>                                                                                                                                                 |

890

891 **Denial**

892 Denial was another common theme (Table 9). Participants described how they did not  
893 take the diagnosis seriously, or felt they could not deal with the required changes and chose to  
894 ignore it or disbelieve it.

895 Table 9. Denial as a Theme.

|                                                                                                                                                                                                                                                                                                                                                                                                                                                                                                                                                                                              |
|----------------------------------------------------------------------------------------------------------------------------------------------------------------------------------------------------------------------------------------------------------------------------------------------------------------------------------------------------------------------------------------------------------------------------------------------------------------------------------------------------------------------------------------------------------------------------------------------|
| “Up to this day, he (my husband) claims that he doesn’t have it...”                                                                                                                                                                                                                                                                                                                                                                                                                                                                                                                          |
| “Me, I don’t feel that I have diabetes. I don’t feel it... My life was all about work my life has been working daily, I think the body gets tired and sometimes wants vitamins and I don’t what else. That’s all I could tell you...that’s what they tell me...to be honest I feel that the cholesterol also makes you dizzy, right? You get dizzy with cholesterol...When I walk a lot, I get home tired, and dizzy but I take some pills that I got here and it goes away. I think is age related you’re old and get tired...I gain weight just sleeping and that’s where I developed it.” |
| “He doesn’t accept it, he says, I don’t have it yet, am in the borderline because when we first started coming, he was on the borderline. He was told is your decision if you want to cross the line. ...Even now he still says that he’s still on the borderline but it’s a lie because he already has it.”                                                                                                                                                                                                                                                                                 |

896

897 **Barriers to change**

898 We asked participants if it was difficult to make the necessary behavior changes and they  
899 identified three types of challenges: 1.) Exercise is hard—lack of time or energy primarily  
900 because of long work hours. 2.) Dietary changes are hard—it is “boring,” the small portions,  
901 “addiction to food,” taste, custom. 3.) Social challenges—other people don’t understand, you  
902 don’t want to offend other people, being around other people who are eating unhealthy foods  
903 makes it harder for you to avoid them. Although it can be difficult to make lifestyle changes,  
904 people see that changing habits, and eating healthier in particular, as an investment. It is a little  
905 more expensive now, but they understand that it is preventative.

906

907 **Agency**

908 Some participants were very motivated and felt they have a lot of control over their  
909 health. This involved acceptance and feeling they have agency to manage the condition and  
910 prevent complications if they take personal responsibility. Others described frustration or  
911 resignation—a feeling that diabetes is controlling them or that it is something external happening  
912 to them.



## 913 **Quantitative Analysis**

### 914 **Aim #1: Primary outcomes**

915 The primary analysis for Aim #1 was to measure and compare improvement in patient  
916 participant capacity for diabetes self-management as indicated by improvement at 6 months in  
917 diabetes knowledge and patient activation. For each outcome variable the resulting model is  
918 interpreted for model fit, time-by-program interaction, main effects not associated with  
919 interactions, and interactions (Fig 3A). Model fit assumptions were not violated.

920

921 **Fig 3. Comparison of results from the Diabetes knowledge questionnaire (DKQ).** Scores are  
922 tabulated and primary contrast over time between programs. (A) Longitudinal plot. (top) The  
923 diamonds are means by program over time, thin lines are trajectories for each PP. (bottom)  
924 Marginal histograms of DKQ scores for each program and time point. (B) Black dots are least-  
925 squares means, 95% confidence intervals represented with blue bars and red comparison arrows  
926 for pairwise comparisons between means. If an arrow from one mean overlaps an arrow from  
927 another group, the difference is not statistically significant. (C) Primary contrast testing whether  
928 the change between time points (e.g., 6 mo vs 0 mo) for CCM was different than the same  
929 change for DSMS. If the 95% confidence interval does not overlap 0, then there is an  
930 (uncorrected) difference between programs over time. Since the 95% CI crosses zero in all three  
931 contrasts, there is no difference between the programs for DKQ. DSMS, diabetes self-  
932 management support empowerment model; CCM, chronic care model.

933

### 934 **Changes in diabetes knowledge**

935 Scores on the PP DKQ-23 were used to measure diabetes knowledge. Scores increased  
936 for patient participants in both programs. Both sites increased their knowledge from baseline to 3  
937 months (approximately 0.75 to 1 point) and sustained their improvement through the end of the  
938 study. There was no Time-by-Program interaction (Fig 3C,  $p$ -value = 0.265), so both programs  
939 changed to similar extents over time; in particular, the Baseline-to-6-month change for CCM  
940 DKQ-23 (a 23-point scale) compared to the change for DSMS was 0.483, 95% CI (-0.119,  
941 1.086). DSMS scored approximately 1.25 points higher than CCM (Fig 3B,  $p$ -value = 0.0009).  
942 The multivariate analysis (Table 10, contrasts not shown) revealed that the PP DKQ-23 Score  
943 was positively related to SSP DKQ-23 Score (regression coefficient (coef) = 0.198, 95% CI:

944 (0.137, 0.258)), negatively related to Age (coef = -0.0266, 95% CI: (-0.0544, 0.00127)), and  
 945 positively related to Education (High School and lower categories had lower scores than Some  
 946 College and above, about 1.75 difference). PP DKQ-23 Score was negatively related to the  
 947 Consumer Assessment of Healthcare Providers and Systems Cultural Competence Set (CAHPS-  
 948 CC) A and B Communication for CCM (coef = -0.626, 95% CI: (-1.11, -0.14)) but positively  
 949 related for DSMS (coef = 0.402, 95% CI: (0.0334, 0.77)) (Fig 3).

950

951 Table 10. DKQ-23 outcome Type III ANOVA Table for reduced longitudinal model.

| <b>Variables</b>                  | <b>NumDF</b> | <b>Pr(&gt;F)</b> |
|-----------------------------------|--------------|------------------|
| Time                              | 3            | <0.0005          |
| Program                           | 1            | 0.044            |
| DKQ-23 Score, SS                  | 1            | <0.0005          |
| CAHPS A&B Communication           | 1            | 0.469            |
| Age                               | 1            | 0.061            |
| Highest level of education        | 4            | <0.0005          |
| Program : CAHPS A&B Communication | 1            | 0.001            |
| Time by Program                   | 3            | 0.265            |

952 Initialisms: Social support (SS), Consumer Assessment of Healthcare Providers and Systems Cultural Competence  
 953 Set (CAHPS-CC) (CAHPS-CC), Diabetes knowledge questionnaire (DKQ-23).  
 954 A Type-3 test assesses whether a term explains substantial variance in the response after adjusting for the other  
 955 covariates. The two primary values to interpret are the numerator degrees-of-freedom and the associated p-value for  
 956 the test.

957

## 958 Patient activation

959 We used the PAM-10 as a proxy for measuring the patient's capacity for self-managing  
 960 their diabetes, conceptualized as patient activation. The average PAM-10 score was 77.3, with  
 961 the vast majority scoring at Level 3 (taking action) or 4 (maintaining behaviors and pushing  
 962 further). Patients in the CCM compared to patients in the DSMS scored higher by four points  
 963 with more patients at Level 4 (72.6% vs 55.0%) and with fewer at Levels 1 and 2 (1.8% vs 5.8%)  
 964 (Table 2).

965 We used the PAM-10 numeric score because it is more sensitive to detecting differences  
 966 than rounding the scores into four activation categories. PAM-10 scores increased for PPs in  
 967 both programs (Fig 4A). Model fit assumptions were not violated. There was no Time-by-  
 968 Program interaction (Fig 4C, p-value = 0.612), so both programs changed to similar extents over  
 969 time; in particular, the Baseline-to-6-month change for CCM compared to the change for DSMS  
 970 was -1.278, 95% CI (-4.56, 2.01). DSMS PAM scores (scale from 0 to 100) were close to 77 at

971 baseline and CCM was close to 78 at baseline, but both increased to about 82 at 3 months and  
 972 beyond (Fig 4B). Both sites increased their activation scores by 6 months (p-value < 0.0001).  
 973 The multivariate analysis (Table 11, contrasts not shown) revealed that the Patient Activation  
 974 (PAM-10) was positively related to age (0.162, 95% CI: 0.046, 0.277), negatively related to  
 975 education (Bachelor’s or higher was lowest at 75, some high school through some college were  
 976 medium at 80, and 8th grade or lower was highest at 86), negatively related to BMI (coef = -  
 977 0.183, 95% CI: -0.378, 0.012), and negatively related to poverty ratio (-1.9, 95% CI: -3.94,  
 978 0.141). Patient activation (PAM-10) was positively related to social support for DSMS (coef =  
 979 0.172, 95% CI: (0.105, 0.238)) but only slightly positive for CCM (coef = 0.0526, 95% CI: -  
 980 0.0205, 0.126). Lastly, patient activation was positively related to CAHPS G Trust for DSMS  
 981 (coef = 3.67, 95% CI: 2.18, 5.15) but not related for CCM (coef = -0.70, 95% CI: -2.63, 1.23).  
 982

983 **Fig 4. Patient Activation Measure (PAM-10) primary contrast over time..** (See Fig 3 for  
 984 panel descriptions.) All three contrasts overlap 0; thus there is no statistically significant  
 985 difference between them. DSMS, diabetes self-management support empowerment model; CCM,  
 986 chronic care model, PAM-10, Patient Activation Measure.

987  
 988 Table 11. PAM-10 outcome Type III ANOVA Table for reduced longitudinal model.

| <b>Variables</b>                      | <b>NumDF</b> | <b>Pr(&gt;F)</b> |
|---------------------------------------|--------------|------------------|
| Event Name                            | 3            | 0                |
| Program                               | 1            | 0                |
| PAM-10 Score, SSP                     | 1            | 0                |
| CAHPS G Trust                         | 1            | 0.017            |
| Age                                   | 1            | 0.006            |
| Highest level of education            | 4            | 0.001            |
| Body mass index (BMI)                 | 1            | 0.065            |
| Income-to-Federal poverty level ratio | 1            | 0.068            |
| Program : PAM-10 Score, SSP           | 1            | 0.018            |
| Program : CAHPS G Trust               | 1            | 0                |
| Event Name : Program                  | 3            | 0.612            |

989 Initialisms: Consumer Assessment of Healthcare Providers and Systems Cultural Competence Set (CAHPS-CC),  
 990 Patient activation measure (PAM-10).  
 991 A Type-3 test assesses whether a term explains substantial variance in the response after adjusting for the other  
 992 covariates. The two primary values to interpret are the numerator degrees-of-freedom and the associated p-value for  
 993 the test.

994

## 995 **Aim #2: Secondary outcomes**

996 Our second aim was to measure and compare PP success at diabetes self-management as  
997 indicated by improvement at 6 months in A1c, depression index score, and body mass index  
998 (BMI).

## 999 **Changes in A1c**

1000 A1c on the  $\log_2$  scale ( $\log_2$  (A1c), here called “A1c”) had an initial slight decrease for  
1001 patient participants in both programs (Fig 5A<sup>2</sup>), and the A1c distribution was hyper-exponential  
1002 showing right skewness even after log transformation. Model fit assumptions were not violated.  
1003 There was no Time-by-Program interaction (Fig 5C, p-value = 0.616), so both programs changed to  
1004 similar extents over time; in particular, the Baseline-to-6-month change for CCM compared to  
1005 the change for DSMS was -0.0165, 95% CI (-0.0786, 0.0456). DSMS was slightly higher than  
1006 CCM for the study period. Both sites decreased their A1c from baseline to 3 months and  
1007 sustained their improvement throughout the end of the study (Fig 5B).

1008

1009 **Fig 5. Analysis of A1c measures.** A1c longitudinal data and primary contrast over time between  
1010 programs. (See Fig 3 for panel descriptions.) DSMS, diabetes self-management support  
1011 empowerment model; CCM, chronic care model; A1c, measure of glycoylated hemoglobin  
1012 proportional to chronic glucose levels.

1013 The multivariate analysis (Table 12, contrasts not shown) revealed that A1c was  
1014 positively related to depression (coef = 0.0204, 95% CI: (-0.00129, 0.0422)). A1c was positively  
1015 related to PP DKQ-23 Score at baseline, but much less so at follow-up, and negatively related to  
1016 SSP DKQ-23 score at baseline, with slightly positive relationships at 3 months and beyond.  
1017 Males started with higher A1c than females at baseline (2.99 vs 2.89) but both reduced to similar  
1018 levels sustained from 3 months (2.84), negatively related to age for DSMS (coef = -0.008, 95%  
1019 CI: (-0.0132, -0.00279)), neutral for CCM (coef = -0.000921, 95% CI: (-0.00745, 0.00561)),  
1020 higher for females at DSMS than at CCM (diff = 0.14, p-value = 0.0123), but for males about the  
1021 same between programs. A1c was strongly negatively related to BMI at baseline (coef = -0.0128,  
1022 95% CI: (-0.0198, -0.00578)) than at the 3-, 6-, and 12-month follow-ups (coefs = -0.0060, -  
1023 0.0070, and -0.0059, respectively), and negatively related to BMI at the CCM site (coef = -

---

<sup>2</sup> This figure was previously published in [72].

1024 0.0147, 95% CI: (-0.0242, -0.00516)) but neutral at the DSMS site (coef = -0.00117, 95% CI: (-  
1025 0.00988, 0.00753)).

1026

1027 Table 12. A1c outcome Type III ANOVA Table for reduced longitudinal model.

| Variables                                | NumDF | Pr(>F) |
|------------------------------------------|-------|--------|
| Event Name                               | 3     | 0.008  |
| Program                                  | 1     | 0.902  |
| DKQ-23 Score, social support participant | 1     | 0.797  |
| Age                                      | 1     | 0.037  |
| Gender                                   | 1     | 0.637  |
| Body mass index (BMI)                    | 1     | 0.016  |
| DKQ-23 Score                             | 1     | 0.150  |
| Depression, log2(PHQ-9 + 2)              | 1     | 0.065  |
| Event Name : DKQ-23 Score                | 3     | 0.061  |
| Event Name : DKQ-23 Score, SS            | 3     | 0.014  |
| Event Name : Gender                      | 3     | 0.021  |
| Event Name : Body mass index (BMI)       | 3     | 0.015  |
| Program : Age                            | 1     | 0.096  |
| Program : Gender                         | 1     | 0.041  |
| Program : Body mass index (BMI)          | 1     | 0.040  |
| Event Name : Program                     | 3     | 0.229  |

1028 Initialisms: Diabetes knowledge questionnaire (DKQ-23), Depression severity (PHQ-9).

1029 A Type-3 test assesses whether a term explains substantial variance in the response after adjusting for the other  
1030 covariates. The two primary values to interpret are the numerator degrees-of-freedom and the associated p-value for  
1031 the test.

1032

### 1033 **Changes in Depression**

1034 Overall, depression as measured by the PHQ-9 and transformed as log2(PHQ-9 + 2),

1035 showed an initial decrease from baseline to 3 months which sustained over time (Fig 6A<sup>3</sup>).

1036 Model fit assumptions were not violated. There was a Time-by-Program interaction (p-value =

1037 0.006) because the degree of change over time differed between programs (Fig 6C); in particular,

1038 the Baseline-to-6-month change for CCM compared to the change for DSMS was -0.266, 95%

1039 CI (-0.464, -0.0669). CCM started lower than DSMS and showed a large initial decrease and

1040 continued downward throughout the study while DSMS showed a small initial decrease through

1041 6 months, then started increasing again by 12 months (Fig 6B), nearly rebounding to their

1042 baseline levels.

<sup>3</sup> This figure was previously published in [72].

1043

1044 **Fig 6. Depression scores contrasted between treatment groups.** Depression (PHQ-9)  
 1045 longitudinal data and primary contrast over time between programs. (See Fig 3 for panel  
 1046 descriptions.) DSMS, diabetes self-management support empowerment model; CCM, chronic  
 1047 care model; PHQ-9, Depression scores.

1048

1049 The multivariate analysis (Table 13, contrasts not shown) revealed that depression was  
 1050 negatively related to the *Consumer Assessment of Healthcare Providers and Systems Cultural*  
 1051 *Competence Set (CAHPS-CC) A and B Communication* (coef = -0.175, 95% CI: (-0.29, -  
 1052 0.0605)), negatively related to CAHPS G Trust (coef = -0.117, 95% CI: (-0.23, -0.0047)), and  
 1053 negatively related to Patient PAM-10 Score (coef = -0.0103, 95% CI: (-0.0145, -0.00605))  
 1054 varying slightly over time. Depression was negatively related to social support PAM-10 score  
 1055 which describes the social support's perception of the patient participants activation, with the  
 1056 strongest negative relationship at baseline but positive at 6 months, positively related to age at 6  
 1057 months and negatively related at baseline and 12 months. Depression was negatively related to  
 1058 patient participant PAM-10 Score for DSMS (coef = -0.0068, 95% CI: (-0.0112, -0.00243)), but  
 1059 neutral for CCM (coef = 0.00156, 95% CI: (-0.00319, 0.00631)), and negatively related to  
 1060 income-to-federal poverty level ratio for DSMS (coef = -0.295, 95% CI: (-0.488, -0.102)) but  
 1061 positively related for CCM (coef = 0.196, 95% CI: (-0.0966, 0.489)).

1062

1063 Table 13. Depression (PHQ-9) outcome Type III ANOVA Table for reduced longitudinal model.

| <b>Variables</b>                          | <b>NumDF</b> | <b>Pr(&gt;F)</b> |
|-------------------------------------------|--------------|------------------|
| Event Name                                | 3            | 0.050            |
| Program                                   | 1            | <0.0005          |
| PAM-10 Score, SSP                         | 1            | 0.112            |
| CAHPS A&B Communication                   | 1            | 0.003            |
| CAHPS G Trust                             | 1            | 0.041            |
| Age                                       | 1            | 0.922            |
| Income-to-Federal poverty level ratio     | 1            | 0.577            |
| PAM-10 Score                              | 1            | <0.0005          |
| Event Name : Program                      | 3            | <0.0005          |
| Event Name : PAM-10 Score                 | 3            | 0.020            |
| Event Name : PAM-10 Score, social support | 3            | 0.004            |

|                                                 |   |       |
|-------------------------------------------------|---|-------|
| participant                                     |   |       |
| Event Name : Age                                | 3 | 0.012 |
| Program : PAM-10 Score, social support          | 1 | 0.011 |
| participant                                     |   |       |
| Program : Income-to-Federal poverty level ratio | 1 | 0.006 |

1064 Initialisms: Consumer Assessment of Healthcare Providers and Systems Cultural Competence Set (CAHPS-CC)  
 1065 (CAHPS-CC), Patient activation measure (PAM-10).  
 1066 A Type-3 test assesses whether a term explains substantial variance in the response after adjusting for the other  
 1067 covariates. The two primary values to interpret are the numerator degrees-of-freedom and the associated p-value for  
 1068 the test.  
 1069

## 1070 **Changes in Body Mass Index (BMI)**

1071 BMI values were very consistent over time (Fig 7A). Model fit assumptions were not  
 1072 violated. There was no Time-by-Program interaction (Fig 7C, p-value = 0.620), so patient  
 1073 participants in both programs changed to a similar extent over time; in particular, the Baseline-  
 1074 to-6-month change for CCM compared to the change for DSMS was -0.148, 95% CI (-0.204,  
 1075 0.501). DSMS had slightly higher mean BMI (difference=1.271 BMI) than CCM across the  
 1076 study period Fig 7B).

1077  
 1078 **Fig 7. Analysis of body mass index (BMI) over time and comparison between cohorts.** BMI  
 1079 outcome longitudinal model data and primary contrast over time between programs. (See Fig 3  
 1080 for panel descriptions.) DSMS, diabetes self-management support empowerment model; CCM,  
 1081 chronic care model; BMI, body mass index.

1082 A multivariate analysis (Table 14, contrasts not shown) revealed that BMI was negatively  
 1083 related to age (coef = -0.0844, 95% CI: (-0.157, -0.011)) with the effect only slightly varying  
 1084 over time, and positively related to PP DKQ-23 Score (coef = 0.0481, 95% CI: (0.00373,  
 1085 0.0925)). BMI was positively related to depression for DSMS (coef = 0.17, 95% CI: (-0.0142,  
 1086 0.357)) but neutral for CCM (coef = -0.0402, 95% CI: (-0.238, 0.157)).

1087  
 1088 Table 14. BMI outcome Type III ANOVA Table for reduced longitudinal model.

| Variables    | NumDF | Pr(>F) |
|--------------|-------|--------|
| Event Name   | 3     | 0.041  |
| Program      | 1     | 0.386  |
| Age          | 1     | 0.024  |
| DKQ-23 Score | 1     | 0.034  |

|                                                    |   |       |
|----------------------------------------------------|---|-------|
| Depression, log <sub>2</sub> (PHQ-9 + 2)           | 1 | 0.343 |
| Program : Depression, log <sub>2</sub> (PHQ-9 + 2) | 1 | 0.124 |
| Event Name : Age                                   | 3 | 0.026 |
| Event Name : Program                               | 3 | 0.620 |

1089 Initialisms: Diabetes knowledge questionnaire (DKQ-23), Depression severity (PHQ-9), Body mass index (BMI).  
1090 A Type-3 test assesses whether a term explains substantial variance in the response after adjusting for the other  
1091 covariates. The two primary values to interpret are the numerator degrees-of-freedom and the associated p-value for  
1092 the test.  
1093

## 1094 **Subpopulation considerations: Results of heterogeneity of treatment effect**

1095 Heterogeneity of Treatment Effect was assessed with the same longitudinal model  
1096 structure with a time-by-program interaction but included only covariates for language, gender,  
1097 and poverty and their interactions with each time and program.

1098 Associations included DKQ and PAM with language, A1c with gender, and BMI with  
1099 poverty, but depression had no associations. DKQ-23 for patient participants speaking "English,  
1100 only" and "Spanish and English" were both about 1.8 points higher than "Spanish, only"  
1101 (roughly, 15.7 vs 13.9). PAM-10 for patient participants speaking "Spanish, only" (coef = 83.6,  
1102 95% CI: (81.4, 85.8)) was about 5 points higher than "English, only" (coef = 78.7, 95% CI:  
1103 (74.8, 82.6)), with "Spanish and English" (coef = 81.4, 95% CI: (77.8, 85)) being in the middle  
1104 and not statistically different from either "only" category.

1105 A1c at baseline for males (coef = 2.99, 95% CI: (2.89, 3.08)) was higher than females  
1106 (2.9, 95% CI: (2.84, 2.96)), but both genders had similar A1c values from 3 months through 12  
1107 months (roughly, coef = 2.83, 95% CI: (2.73, 2.93)). A1c for females at DSMS (coef = 2.91,  
1108 95% CI: (2.84, 2.98)) was higher than at CCM (coef = 2.78, 95% CI: (2.7, 2.86)), but males at  
1109 both programs had similar A1c values (roughly, coef = 2.88, 95% CI: (2.74, 3.00)).

1110 PHQ-9 was not related to poverty, gender, or language, only to program and time.

1111 BMI was higher for patient participants above the FPL at DSMS (coef = 34.3, 95% CI:  
1112 (32.6, 35.9)) than at CCM (coef = CCM = 30.2, 95% CI: (27.1, 33.4)), but about the same  
1113 between programs for patient participants below the FPL (both roughly coef = 32.8, 95% CI:  
1114 (31.5, 34.2)).



1115 Outcome changes by baseline PAM, A1c, PHQ-9, and BMI categories are grouped by  
1116 their baseline categories and plotted over time to show differential effects in Fig 8<sup>4</sup>. These  
1117 analyses should be interpreted cautiously because of the small sample sizes.

1118 PAM overall trends showed a slight increase for both programs, but there are larger  
1119 increases in the few patient participants who were lowest at baseline with very significant and  
1120 greater change at CCM. There was no change for those patient participants who were already  
1121 activated in either program, which represented the vast majority.

1122 A1c remained consistently low in both programs for prediabetes and diabetes patient  
1123 participants who started the program with lower A1c levels (<9). Both programs had large  
1124 effects on higher A1c levels (≥9), with the CCM program showing the strongest effect. Neither  
1125 program resulted in A1c reaching normal glycemic levels of <5.6, but at CCM high A1cs  
1126 dropped below 9, which is clinically meaningful. Both programs kept those with prediabetes  
1127 from elevating into the diabetes range and kept lower diabetes range scores from elevating  
1128 higher. This is also clinically meaningful. While CCM patient participants, even those entering at  
1129 the higher levels, dropped below 9, the higher A1c group in the DSMS program did not achieve  
1130 that degree of diabetes control. The largest effect was seen at the 3-month time point in both  
1131 programs.

1132 PHQ-9 depression scores showed the most difference between baseline and subsequent  
1133 time points in CCM, with some smaller improvements in DSMS. Again, the biggest change was  
1134 in the first three months with some continuing improvement at 6 months. The least depressed  
1135 group did not improve further.

1136 BMI was static in both programs, remaining approximately constant at baseline and at 12  
1137 months, (32.6 and 33.6 respectively). PAM-10 trajectories are similar between programs (Fig 9).  
1138 Patient participants in the highest-A1c baseline category at CCM had greater decreases in A1c  
1139 than at DSMS, with more than half of them lowering below 9 (Fig 10<sup>5</sup>). PHQ-9 shows that  
1140 depression is higher with Baseline A1c, at Program DSMS depression is higher than at CCM  
1141 overall, decreases at CCM are greater at all A1c baseline categories with median PHQ-9 values  
1142 ending below 5 for all categories, while DSMS ends below 5 in only the lowest A1c category

---

<sup>4</sup> This figure was previously published in [72].

<sup>5</sup> This figure was previously published in [72].

1143 and all categories showing increases in depression by 12 months (Fig 11<sup>6</sup>). BMI trajectories are  
1144 similar between programs with no interpretable pattern (Fig 12).

1145  
1146 **Fig 8. Comparison across four outcome measures (PAM-10, A1c, PHQ-9, and BMI).** The  
1147 mean change over time for each group is defined by their baseline group category. PAM-10  
1148 levels: 0.0 - 45.1, Level 1 Disengaged and overwhelmed; 47.4 - 52.9, Level 2 Becoming aware,  
1149 but still struggling; 56.0 - 72.1, Level 3 Taking action; and 75.5 - 100, Level 4 Maintaining  
1150 behaviours and pushing further. A1c levels: 0 - 5.7, Neither; 5.7 - 6.4, Pre-diabetes; and 6.4 -  
1151 14+, Diabetes. PHQ-9 levels: 0 - 4, None-minimal; 5 - 9, Mild; 10 - 14, Moderate; 15 - 19,  
1152 Moderately Severe; and 20 - 27, Severe. BMI levels: 0 - 18.5, Underweight; 18.5 - 25, Normal  
1153 or Healthy Weight; 25 - 30, Overweight; and 30+, Obese. DKQ Score has no defined levels so is  
1154 not shown. DSMS, diabetes self-management support empowerment model; CCM, chronic care  
1155 model; PAM-10, Patient activation measure; PHQ-9, Depression severity (PHQ-9); BMI, body  
1156 mass index.

1157  
1158 **Fig 9. PAM-10 outcome by A1c Baseline category.** Small improvement in most A1c categories  
1159 occurs in both groups in the first 3 months and in the lowest category over the year. Numbers of  
1160 subjects in each A1c category for each cohort appears above the trajectory. (See Fig 8 for  
1161 categories.). DSMS, diabetes self-management support empowerment model; CCM, chronic  
1162 care model; PAM-10, Patient activation measure.

1163  
1164 **Fig 10. A1c outcome by A1c Baseline category.** Patient participants in the highest-A1c  
1165 baseline category at CCM had greater decreases in A1c than at DSMS, with more than half of  
1166 them lowering below 9. (See Fig 8 for categories.) DSMS, diabetes self-management support  
1167 empowerment model; CCM, chronic care model.

1168  
1169 **Fig 11. PHQ-9 outcome by A1c Baseline category.** Depression is higher with Baseline A1c,  
1170 decreases at CCM are greater at all A1c baseline categories. (See Fig 8 for categories.) DSMS,

---

<sup>6</sup> This figure was previously published in [72].

1171 diabetes self-management support empowerment model; CCM, chronic care model; Depression  
1172 severity (PHQ-9).

1173  
1174 Fig 12. **BMI outcome by A1c Baseline category.** BMI trajectories are similar between  
1175 programs. (See Fig 8 for categories.) DSMS, diabetes self-management support empowerment  
1176 model; CCM, chronic care model; BMI, body mass index.

1177

## 1178 **Programmatic Analyses**

### 1179 **Aim #3: Culture and context of programs**

1180 Our third aim was to characterize the ways that two distinct culturally competent diabetes self-  
1181 management programs (DSMS and CCM) interface with patient participant culture and  
1182 socioeconomic context.

### 1183 **Program assessments**

1184 The section on “comparators” provides a description of each program. Both emphasize  
1185 the importance of understanding patient needs, including from a cultural and contextual  
1186 perspective. One staff member at DSMS said that they do not just talk about what to eat or not  
1187 eat—they cover depression, stress management, and difficult topics like erectile dysfunction,  
1188 kidney failure, and amputation. They do a meditation and deep breathing exercise to help people  
1189 learn alternative methods for stress reduction, they encourage the patients to bring a social  
1190 support with them to the classes (without charge), and they were in the process of developing a  
1191 relationship with the local food bank in order to better address patient needs in relations to diet  
1192 and food insecurity. A strength of the DSMS program from the perspective of program staff is  
1193 their emphasis on identifying individual needs and tailoring the experience for each patient with  
1194 a heavy focus on helping people learn how to set goals. The group dynamic of the classes was  
1195 identified as a strength. Challenges identified primarily related to lack of time, insufficient staff,  
1196 space, funding, and resources. The DSMS program made some alterations to the way they  
1197 delivered the program during the middle of the project. These changes were required by  
1198 guidance from the ADA to maintain program accreditation.

1199 The strengths of the CCM program from the perspective of staff are the relationship of  
1200 trust that they enjoy in the community, the fact that the staff are both “in” and “of” the

1201 community, and that the services provided are holistic and wrap-around. The challenges  
1202 identified were lack of financial resources and a need for more staff and space. At CCM, because  
1203 the program is community-led and community-run, the program focuses holistically on the  
1204 patient and their family, and the CCM facility has a feel more like somebody's home than that of  
1205 an office or a clinic. A broad range of services is available, in addition to the ongoing diabetes  
1206 classes, including primary care, dental care, psychiatric care, a food coop, children's educational  
1207 activities and classes, and exercise classes. CCM is operated by a faith-based nonprofit, so the  
1208 spiritual dimension of people's lives is incorporated if the patient would like to "sit and pray"  
1209 alone or with others. Stress management is covered in the diabetes classes, and mental and  
1210 behavioral health services are available. Through a number of CHW-run programs on site, CCM  
1211 screens patients for social needs and provides navigation, including related to domestic violence,  
1212 legal services, education, parenting, substance misuse, housing insecurity, food insecurity, and  
1213 access to safety net programs like SNAP, WIC, prescription discount programs, utilities support  
1214 programs, and Medicaid. CCM does not accept insurance, and the fee for services is nominal or  
1215 waived, depending on patient circumstance and capacity to pay.

1216 A primary difference between the two sites is in relation to language—a core element of  
1217 program cultural competence. At DSMS, the default program language spoken is English, but  
1218 approximately 25% of patients are Spanish speakers, with a smaller number monolingual  
1219 Spanish speakers. All of the handouts DSMS uses are available in Spanish, including recipes,  
1220 but only one staff person speaks any Spanish. A primary concern among DSMS staff was the  
1221 inability of the program to hire a Spanish-speaking diabetes educator to lead the classes because  
1222 of budgetary constraints. Monolingual Spanish-speaking diabetes patients are given a truncated  
1223 delivery of the class using an interpreter.

1224 The default language at CCM is Spanish but there is significant capacity for bilingual  
1225 communication. The vast majority of CCM patients are Spanish-speaking—either monolingual  
1226 or bilingual. All of the staff at CCM are Spanish-speaking, and most are bilingual in Spanish and  
1227 English. A few staff are monolingual Spanish speakers. Volunteer medical providers who see  
1228 patients at CCM (primarily MDs from UNM) and volunteer educators (UNM pharmacy students,  
1229 medical students, and family medicine residents) are a mix of bilingual and non-Spanish-  
1230 speaking. However, a translator is used if needed.

1231

1232 **Cultural competence surveys**

1233 Consumer Assessment of Healthcare Providers and Systems Cultural Competence Set  
1234 (CAHPS-CC) composite scores for five domains had a similar pattern between programs.  
1235 Overall quality of care, communication, equitable treatment, and trust were rated very high by  
1236 participants in both programs. Overall quality of care (A), Patient Participant-Provider  
1237 Communication (B), and Trust (G) were scored higher by patient participants at CCM than at  
1238 DSMS. Interpreter Services (H) was scored slightly lower among patient participants who  
1239 required interpreter services, but more negative for patient participants at DSMS than at CCM  
1240 (Table 15).  
1241

1242 Table 15. Consumer Assessment of Healthcare Providers and Systems Cultural Competence Set  
 1243 (CAHPS-CC) Cultural Competence domain scores.

| CAHPS Cultural Competence      | (N=) | All Patient Participants<br>(N=226)<br>Median [Q1; Q3] | Program                           |                                    | P <sup>a</sup> |
|--------------------------------|------|--------------------------------------------------------|-----------------------------------|------------------------------------|----------------|
|                                |      |                                                        | CCM<br>(N=106)<br>Median [Q1; Q3] | DSMS<br>(N=120)<br>Median [Q1; Q3] |                |
| PP and SSP, quality of care    | 216  | 0.86 [0.74;0.93]                                       | 0.87 [0.78;0.94]                  | 0.83 [0.71;0.92]                   | 0.030          |
| A&B. PP-Provider Communication | 217  | 0.96 [0.90;1.00]                                       | 0.97 [0.93;1.00]                  | 0.95 [0.85;1.00]                   | 0.007          |
| F. Equitable treatment         | 217  | 1.00 [1.00;1.00]                                       | 1.00 [1.00;1.00]                  | 1.00 [1.00;1.00]                   | 0.064          |
| G. Trust                       | 217  | 0.90 [0.74;0.97]                                       | 0.92 [0.79;0.97]                  | 0.88 [0.67;0.96]                   | 0.050          |
| H. Interpreter Services        | 82   | -0.11 [-0.22;0.00]                                     | -0.06 [-0.20;0.00]                | -0.13 [-0.23;-0.11]                | 0.008          |

1244 <sup>a</sup>P-values reported from the Kruskal-Wallis test for continuous and from the chi-square test with continuity  
 1245 correction for categorical data.

1246 Initialisms: Diabetes Self-management support empowerment model (DSMS), Chronic care model (CCM),  
 1247 Consumer Assessment of Healthcare Providers and Systems Cultural Competence Set (CAHPS-CC).

1248

## 1249 **Discussion**

1250 Our hypothesis was that diabetes self-management programs are most successful if their  
1251 design is culturally and contextually “situated” [40,43,44] by positively leveraging the cultural  
1252 values and accommodating the socio-economic circumstances of a patient population in a way  
1253 that creates synergy with patients’ everyday lives [20–26,29,30,81]. To test this hypothesis, we  
1254 compared two program models--one based in an academic medical center using an approach  
1255 based on group educational sessions taught by a trained diabetes educator and the other, a  
1256 community-run program based on a wrap-around services model. Although they are both  
1257 described as “culturally competent,” they differ strongly in the extent to which they embody  
1258 characteristics of cultural and contextual situatedness.

### 1259 **Primary outcomes: Diabetes knowledge and patient activation**

1260 For diabetes knowledge and patient activation (capacity for change), we found no  
1261 statistical differences between programs.

1262 Diabetes knowledge increased slightly in patient participants in both programs. DSMS  
1263 patients started higher but the change at both sites was parallel. At DSMS, better “patient  
1264 participant-provider communication” as measured by the Consumer Assessment of Healthcare  
1265 Providers and Systems Cultural Competence Set (CAHPS-CC), was associated with higher  
1266 diabetes knowledge scores. At CCM, there was a counter-intuitive association between less  
1267 effective patient participant-provider communication and higher diabetes knowledge scores,  
1268 which on face value was challenging to interpret.

1269 Most patient participants at both sites reported high capacity for diabetes self-  
1270 management and scored highly on our patient activation measure, which made it difficult to  
1271 show any differences (ceiling effect). Both programs were generally similarly effective at  
1272 increasing a patient participant’s activation from baseline to three months and tended to stay at  
1273 the higher level for the rest of the study period.

1274 However, there were differences between the sites, with CCM patient participants  
1275 generally being more activated than DSMS patient participants. We believe that the higher-level  
1276 activation at CCM is related, in part, to the need for CCM participants to rely on themselves  
1277 rather than medical treatment for managing their diabetes or their health in general because, as  
1278 indicated above, few CCM patients have health insurance. Moreover, in the interviews and focus

1279 groups, we gathered data suggesting that few CCM patient participants qualify for safety net  
1280 benefit programs that provide supports for unemployment, disability, food insecurity, or rental  
1281 assistance. Most patient participants at DSMS were using these safety net programs, including  
1282 many on Social Security Disability Insurance (SSI). Therefore, as indicated in the discussion of  
1283 the qualitative results, we found that CCM patient participants are generally much more  
1284 concerned than DSMS patient participants about the potential of diabetes to negatively impact  
1285 their ability to work and to provide support for a family—and more patient participants at CCM  
1286 were married or living with a partner than at DSMS.

1287 In addition, patient participants in the CCM program who scored very low on the PAM at  
1288 baseline made more and sustained change, ending up as high or higher than those with higher  
1289 scores at both time points (please interpret this subgroup observation with caution). Those with  
1290 low activation at DSMS were not able to become activated to the level of the vast majority of  
1291 other participants in the study.

## 1292 **Secondary outcomes: changes in A1c, BMI, and depression**

1293 For our secondary outcomes of changes in A1c, and BMI, we did not find statistically  
1294 significant differences between programs. In relation to A1c, we found that blood sugar levels at  
1295 both sites decreased and that the difference in the decrease between the sites was not statistically  
1296 significant. At both sites, after initial decrease at three months, the change was sustained for the  
1297 rest of the study—although the change was not statistically significant at either site. The decrease  
1298 seems slightly better sustained at DSMS, but the actual A1c values began lower and stayed lower  
1299 at CCM.

1300 Baseline values at both sites were similar in relation to the number of patient participant  
1301 A1cs indicating prediabetes (6 vs 8), low (39 vs 41), medium (36 vs 31), and very high (13 vs  
1302 15) A1c values, but DSMS had notably more patient participants in the high range (26 vs 11).

1303 Although neither program lowered participant A1c into a non-diabetes range, patient  
1304 participants with prediabetes in both programs had A1c scores that remained below 6.4 and  
1305 lower diabetes range scores (6.4-9.0) did not elevate higher. While stable A1c levels could be  
1306 due to a variety of factors, and prediabetes does not inevitably get worse, especially over a short  
1307 period of observation, this is a desired clinical outcome with long-term health implications. The  
1308 literature demonstrates [82–86] that every 1% decrease in A1c is associated with improved



1309 health outcomes and reduced risk related to developing complications such as  
1310 retinopathy/blindness, kidney disease, neuropathy, diabetes-related hospitalization,  
1311 cardiovascular disease (CVD), and diabetes-related mortality. Skyler and colleagues [82] found  
1312 that for each 1% decrease in A1c, there was a statistically significant 18% reduction in CVD  
1313 events—the primary risk of death for people with diabetes. Similarly, Huang and colleagues [87]  
1314 found that risk of complications and death became significantly higher above 9.0. The risk  
1315 threshold for diabetic ketoacidosis (“diabetic coma”) [88] is also an A1c of 9. Therefore, of  
1316 greater interest, although the difference in the change in A1c over time was not found to be  
1317 statistically significant between programs, nor was the change dramatic, there was a key  
1318 clinically meaningful difference, especially true for patient participants with higher baseline A1c  
1319 values. At CCM, average “very high” A1cs dropped below 10 and the median was below 9.  
1320 While on average CCM PPs, even those entering at the higher levels, dropped below 10—and  
1321 the median was below 9, the higher A1c group in the DSMS program did not achieve that degree  
1322 of diabetes control. The results for patient participants who had high A1c at baseline and dropped  
1323 on average below 10 with the median below 9 have positive health implications.

1324 Patient participants at CCM, perhaps in part because they tended to start with lower A1c  
1325 values overall (including fewer with A1c over 10), were more activated [89], and were less  
1326 depressed (discussed below) at baseline, were able to bring their A1c down to approximately 9.0,  
1327 the risk threshold for diabetic coma [88]. At DSMS, in part because they started with higher  
1328 A1cs, were less activated, and more depressed (discussed below), patient participants tended not  
1329 to lower their A1c near 9.0. Because of the clinically important impact of each 1%  
1330 increase/decrease in A1c on risk for diabetes-related health complications and the increased risk  
1331 of complications over time, projected long-term clinical outcomes for the two sites would appear  
1332 to be meaningfully different. Because more change and a sustained lower level was obtained by  
1333 CCM patient participants, CCM came much closer to achieving the goal of managing their  
1334 diabetes than patient participants at DSMS.

1335 There was no difference between the sites in relation to improvement in BMI. Neither  
1336 site produced reductions.

1337 An important area where we found a statistically and clinically significant difference  
1338 between the two sites and also revealed important dynamics related to social support was in  
1339 relation to depression symptoms [72]. CCM started with baseline depression scores that were

1340 generally lower than those at DSMS, though at both sites a majority of participants had either  
1341 “none-minimal” or “mild” severity scores (CCM 84.9%, DSMS 71.7%). Both sites reduced their  
1342 level of depression symptoms after baseline, but despite starting with less depression (which one  
1343 could hypothesize should make it more difficult to change), depression scores at CCM improved  
1344 more than DSMS, and while CCM improvement continued over the period of the study, at  
1345 DSMS, the improvement was not sustained. Again, the biggest change was in the first three  
1346 months with some continuing improvement at 6 months, except for the most highly scoring  
1347 patient participant in the CCM program, where improvement appeared only at 6 months. The  
1348 least depressed group did not improve further.

1349         As anticipated from research on diabetes and depression, we found that depression  
1350 symptoms were related to A1c. Patient participants with higher depression scores tended to have  
1351 higher A1cs. We also found that the diabetes knowledge of the social support was important—  
1352 higher diabetes knowledge of the social support was associated with lower depression symptoms  
1353 and better A1c values. The design of the CCM program that involves ongoing peer support  
1354 together with the demonstrated high level of trust and cultural competence at CCM can be  
1355 hypothesized to provide a more “supportive” environment involving more in-person contact and  
1356 the creation of a larger social network. We hypothesize that more trust in the site as indicated in  
1357 scores for the Consumer Assessment of Healthcare Providers and Systems Cultural Competence  
1358 Set (CAHPS-CC) (Table S 1) may lead participants to be more interested in participating and  
1359 develop a feeling of commitment to others related to “showing up” to ongoing group and  
1360 individual meetings. These meetings become a type of peer support, with patient participants  
1361 who attend sharing recipes and strategies for diabetes management. Our interpretation is that this  
1362 sharing and empathy likely contribute to the lower and more sustained levels of depression  
1363 symptoms. Participants at both sites indicated the importance of these factors in qualitative data,  
1364 and our broader research with Latina and Mexican immigrant women and CHWs in Albuquerque  
1365 strongly supports this finding of the deep importance of social support in the lives of Latinxs  
1366 [90–95]. In fact, this is why our patient advisors were adamant that we find a way to include  
1367 social support and social context in the design of our study, and why we enrolled participants as  
1368 patient participant-social support participant dyads rather than merely recruiting patient  
1369 participants to participate as individuals.

1370 Furthermore, although patient participants at both sites rated their program high in  
1371 cultural competence and expressed that they really like the program and the staff, when posed  
1372 with a question about what was missing from the program design, DSMS patient participants  
1373 tended to indicate that the DSMS model of six discrete group sessions was not really sufficient  
1374 and was less attractive than a program like the CCM that provides ongoing classes and support.  
1375 DSMS patient participants and their social support participants reported that patient participants  
1376 often feel socially isolated and alone in relation to the issue of diabetes—and CCM patient  
1377 participants discussed the importance of having the social support of the program in an ongoing  
1378 way. Greater social support and interaction and less social isolation at CCM might help to  
1379 explain the lower levels of depression symptoms overall, as well as the greater and more  
1380 sustained decrease in depression after joining the program.

1381 Data modeling and visualization revealed that changes were not uniform, thus the  
1382 exploratory, post-hoc subgroup analysis helped provide additional understanding of who had  
1383 bigger changes than others. A subgroup analysis by A1c baseline category showed that  
1384 depression symptoms at DSMS is higher than at CCM overall, decreases at CCM were greater at  
1385 all A1c baseline categories with median values ending below 5 for all categories, while DSMS  
1386 ends below 5 in only the lowest A1c category and all categories showing increases in depression  
1387 by 12 months.

## 1388 **Cultural competence of programs**

1389 Overall Consumer Assessment of Healthcare Providers and Systems Cultural  
1390 Competence Set (CAHPS-CC) composite scores were high at both sites. Nearly all patient  
1391 participants rated their program positively, and the range was not wide. CCM was somewhat  
1392 more positive. The CAHPS-CC sub-scales reflect domains that have been identified as important  
1393 components for culturally competent programming. Two key CAHPS-CC sub-scales did  
1394 demonstrate statistically significant differences between the sites: “Patient participant-provider  
1395 communication” and “Trust”. CCM scored very high for both domains. We hypothesize that  
1396 these two characteristics are associated with cultural competence. Our take-away from these  
1397 results is that CCM outperformed DSMS on the CAHPS-CC. While both sites do an excellent  
1398 job addressing issues of cultural competence through program design and services, CCM is the  
1399 more culturally competent of the two sites—a finding that aligns with both our theoretical model

1400 and with the discussion and interpretation of the outcomes below. The CCM is designed to  
1401 address the specific needs of Latinx patients from low-income households [29,30] by creating  
1402 comprehensive, integrated, wrap-around services focused on culturally competent care ].

### 1403 **Outcomes and Comparative Effectiveness of the Two Programs**

1404 Findings from this study demonstrate comparative effectiveness of two culturally and  
1405 contextually situated models of diabetes self-management and education. The two models were  
1406 similar in many ways: both were deemed culturally competent by PPs and SSPs, and we did not  
1407 find statistically different results between the two sites with respect to the primary outcome  
1408 measures and only one of the three secondary outcomes showed differential results. Moreover,  
1409 the design of this study was observational, and given major differences in site context and  
1410 patients enrolled, residual confounding is likely. However, given the higher cultural competence  
1411 rating (0.87 vs 0.83), statistically significant improvement in depression (larger decrease by -  
1412 0.266) [72], and the importance of social support to the patients (84.9% vs 71.4% strongly  
1413 agree), the results suggest that culturally and contextually situating a diabetes intervention may  
1414 deliver benefit for patients, especially for some subgroups of patients.

1415 While the results appear to align with findings in the broader literature that cultural  
1416 competence plays a role as beneficial for health promotion programming [27,81], especially for  
1417 some populations, we recognize that the CCM model requires a substantial commitment to  
1418 creating wrap-around services that put the patient and the patient's needs at the center of care and  
1419 include taking values, customs, beliefs, and language from Latinx culture into account. This is  
1420 not a model currently in wide use, and it could be challenging for some sites to implement.  
1421 While it was not within the scope of this study to speak further to the generalizability of the  
1422 model, further study may show the more nuanced ways that each of these models operates to  
1423 produce cultural competence for sub-populations.

1424

### 1425 **Understanding the results**

1426 Comparison of the two programs and patient participant outcomes at both sites  
1427 demonstrated less overall difference than hypothesized; however, differences between the two  
1428 sites in patient participant perceptions of program cultural domains of trust and patient  
1429 participant-provider communication, depression scores, associations with poverty, and the

1430 clinical significance of comparative A1c scores align with our hypothesis of the importance of  
1431 cultural and contextual situatedness in creating program cultural competence. A culturally and  
1432 contextually situated program positively leverages the cultural values and accommodates the  
1433 socio-economic circumstances of a patient population in a way that creates synergy with  
1434 patients' everyday lives [20–26,29,30,81].

1435 Strikingly, neither program achieved the goal of reaching an A1c of 7.0, neither program  
1436 showed change in BMI, and only the CCM program showed better depression scores, although  
1437 not to a non-depressed state, (PHQ-9 <4). At CCM, depression scores of subjects with both  
1438 moderately severe or moderate depression (10-14) fell to mild depression (4-9), a meaningful  
1439 achievement. At DSMS, this improvement was seen in the moderate depression group at 3 and 6  
1440 months, but not at the 12-month follow-up. Thus, while there were some advantages to the CCM  
1441 program, neither program achieved the ultimate goal and made only moderate progress towards  
1442 the clinical end points of normal glycemia, BMI within normal limits, and no depression. These  
1443 findings suggest that more work needs to be done to mitigate long term life-threatening  
1444 consequences of diabetes.

1445

## 1446 **Limitations and generalizability**

1447 We compared two real world programs to avoid the problem of overly controlled or  
1448 delimited environment that does not replicate real world conditions that can happen with  
1449 randomized control trials. We recognize that this introduces differences in the populations as  
1450 well as differences in the interventions and the responses to them that cannot be controlled for in  
1451 our analysis of the outcomes and that the associations we observed are not necessarily causal.

1452 This study was also limited by variations at intake within each study group. While CCM  
1453 PPs were patients at a community clinic that does not accept insurance and has nominal fees,  
1454 those at DSMS were referred by physicians to a program that requires either insurance or self-  
1455 pay. Differing demographics at intake included income/poverty level, size of households,  
1456 education level, A1c scores, depression scores, and BMI. Differences in the populations as well  
1457 as clinical setting could not be adjusted for completely in our multi-variate analyses and may  
1458 bias the association between self-management programs and the outcomes. And furthermore,  
1459 data on patient adherence to the DSMS and CCM programs were not available.

1460 This study used a non-randomized quasi-experimental design study. The two comparator  
1461 sites are distinct in their diabetes management program models, thus allowing (after controlling  
1462 for other factors) for direct comparison of the effects of the program on the primary and  
1463 secondary outcomes. This choice of comparators will reduce the potential for bias for the  
1464 following reasons: (A) the two comparators serve relatively similar populations in terms of socio-  
1465 demographic attributes; (B) diabetes self-management program models in use at the two  
1466 comparator sites have program attributes that are sufficiently distinct to allow contrast and  
1467 comparison; and, (C) each of the comparator sites is implementing a program in a “real life”  
1468 setting, thus providing the opportunity for a pragmatic assessment of the comparative  
1469 effectiveness of the program models under externally valid and generalizable conditions.

1470 Patient stakeholder data collectors (PSDCs) were recruited from the patient population.  
1471 This project could not have been accomplished without this design feature, and the science was  
1472 significantly enhanced, as evidenced by successful recruitment of a hard-to-reach population and  
1473 notably low attrition. This finding contributes to the current literature on patient-engaged and  
1474 community-engaged research and is supported by our own publications.

1475

## 1476 **Conclusions**

1477 Our results suggest that a holistic, culturally and contextually situated approach to diabetes  
1478 prevention and self-management can be beneficial to patients and to their families, caregivers  
1479 and social supports. The data suggest that integrated, ongoing support is potentially helpful for  
1480 patients with diabetes. We learned the important role that social support plays in the lives of  
1481 diabetes patients and care givers and that more attention needs to be paid to integrating these  
1482 dimensions of a patient’s reality into care.

1483 This study compared diabetes self-management over a 12-month period for 226 Latinx  
1484 diabetes patients from two different diabetes self-management programs. Although they are both  
1485 described as “culturally competent,” they differ strongly in the extent to which cultural  
1486 characteristics are embedded in their structure and function. The primary outcome, improved  
1487 capacity for diabetes self-management measured through improvements in diabetes knowledge  
1488 and diabetes-related patient activation, was equivalent for both programs. Both programs  
1489 resulted in improved A1c levels, although no change in BMI. The only statistically significant

1490 difference between programs was the effect on one of the secondary outcomes of depression  
1491 scores, which were more improved in the CCM than the DSMS program [72], and were more  
1492 significant in patients with severe diabetes ( $A1c > 10$ ). In this A1c category, improvement in  
1493 A1c levels followed decreasing depression scores, indicating a subtle but powerful impact of that  
1494 treatment model. Decreases of A1c in this range are associated with fewer secondary effects of  
1495 the hyperglycemia clinically.

1496         Using exploratory, post-hoc subgroup analyses, we found differences between small  
1497 subgroups of patients based on lower baseline PAM and higher baseline A1c and depression  
1498 scores, and based on scores on the Consumer Assessment of Healthcare Providers and Systems  
1499 Cultural Competence Set (CAHPS-CC) that were supported by qualitative data and clinically  
1500 meaningful differences in A1c outcomes, all of which pointed toward CCM as the more  
1501 culturally and contextually situated model. In future a study focusing on patients with high A1c  
1502 levels in a large enough cohort for more statistical power would be useful and may reveal  
1503 treatment and prevention modalities for the life-threatening sequelae of diabetes. As such, this  
1504 study demonstrates that culturally and contextually situated approaches can successfully deliver  
1505 effective benefits for diabetes self-care, and that even more graded interventions may be required  
1506 to enhance self-management and eliminate the long-term lethal complications of diabetes in this  
1507 population.

1508

## References

1. Page-Reeves J, Regino L, Murray-Krezan C, Bleecker M, Erhardt E, Burge M, et al. A comparative effectiveness study of two culturally competent models of diabetes self-management programming for Latinos from low-income households. *BMC Endocr Disord*. 2017 Dec;17(1):1–8.
2. Institute of Medicine (US). Initial National Priorities for Comparative Effectiveness Research [Internet]. Washington, DC: National Academies Press; 2009. Available from: <http://www.nap.edu/catalog/12648/initial-national-priorities-for-comparative-effectiveness-research>
3. Centers for Disease Control and Prevention. National Diabetes Statistics Report [Internet]. Atlanta, GA: US Department of Health and Human Services; 2022 [cited 2022 Jul 15]. Available from: [cdc.gov/diabetes/data/statistics-report/index.html](https://www.cdc.gov/diabetes/data/statistics-report/index.html)
4. Beckles G, Zhu J, Moonesinghe R. Diabetes - United States, 2004 and 2008. *MMWR Morb Mortal Wkly Rep*. 2011 Jan 14;60(Suppl):90–3.
5. Office of Minority Health. Diabetes and Hispanic American [Internet]. U.S. Department of Health and Human Services; [cited 2022 Aug 6]. Available from: <https://minorityhealth.hhs.gov/omh/browse.aspx?lvl=4&lvlid=63>
6. Brown A, Patten E. Hispanics of Mexican Origin in the United States, 2011 [Internet]. Pew Research Center; 2013 Jun [cited 2015 Nov 10]. Available from: <https://www.pewresearch.org/hispanic/2013/06/19/hispanics-of-mexican-origin-in-the-united-states-2011/>
7. New Mexico Department of Health. Mortality Data, Years 1999-2013 - Leading Causes of Death Counts [Internet]. New Mexico's Indicator-Based Information System. [cited 2016 Feb 1]. Available from: <https://ibis.health.state.nm.us/query/result/mort/MortCnty/LCDCCount.html>
8. New Mexico Department of Health. New Mexico Prediabetes and Diabetes Facts. 2015 May.
9. Harvard T.H. Chan School of Public Health. Press release: New poll finds diabetes top health concern for Latino families [Internet]. News. 2014 [cited 2015 Nov 10]. Available from: <https://www.hsph.harvard.edu/news/press-releases/diabetes-top-health-concern-for-latino-families/>
10. Agardh E, Allebeck P, Hallqvist J, Moradi T, Sidorchuk A. Type 2 diabetes incidence and socio-economic position: a systematic review and meta-analysis. *Int J Epidemiol*. 2011 Jun 1;40(3):804–18.
11. Chaufan C, Davis M, Constantino S. The twin epidemics of poverty and diabetes: understanding diabetes disparities in a low-income Latino and immigrant neighborhood. *J Community Health*. 2011 Dec;36(6):1032–43.
12. Gaskin DJ, Thorpe Jr. RJ, McGinty EE, Bower K, Rohde C, Young JH, et al. Disparities in diabetes: the nexus of race, poverty, and place. *Am J Public Health*. 2014 Nov;104(11):2147–55.
13. Lysy Z, Booth GL, Shah BR, Austin PC, Luo J, Lipscombe LL. The impact of income on the incidence of diabetes: a population-based study. *Diabetes Res Clin Pract*. 2013 Mar 1;99(3):372–9.



14. Kaiser Family Foundation. Poverty Rate by Race/Ethnicity [Internet]. [cited 2022 Aug 29]. Available from: <https://www.kff.org/other/state-indicator/poverty-rate-by-raceethnicity>
15. US Census Bureau. 2009-2013 American Community Survey 5-Year Estimates [Internet]. [cited 2015 Jun 17]. Available from: <https://www.census.gov/programs-surveys/acs/technical-documentation/table-and-geography-changes/2013/5-year.html>
16. Community Preventive Services Task Force. Diabetes Prevention and Control: Combined Diet and Physical Activity Promotion Programs to Prevent Type 2 Diabetes Among People at Increased Risk [Internet]. Guide to Community Preventive Services. 2014 [cited 2015 Nov 10]. Available from: <https://www.thecommunityguide.org/findings/diabetes-combined-diet-and-physical-activity-promotion-programs-prevent-type-2-diabetes.html>
17. Guidelines for the Management of Diabetes Mellitus [Internet]. Michigan Quality Improvement Consortium; 2012 [cited 2015 Nov 10]. Available from: [http://mqic.org/pdf/mqic\\_management\\_of\\_diabetes\\_mellitus\\_cpg.pdf](http://mqic.org/pdf/mqic_management_of_diabetes_mellitus_cpg.pdf)
18. Haas L, Maryniuk M, Beck J, Cox CE, Duker P, Edwards L, et al. National standards for diabetes self-management education and support. *Diabetes Care*. 2014 Jan;36(Supplement 1):S100-108.
19. Knowler WC, Barrett-Connor E, Fowler SE, Hamman RF, Lachin JM, Walker EA, et al. Reduction in the incidence of type 2 diabetes with lifestyle intervention or metformin. *The New England Journal of Medicine*. 2002 Feb 7;346(6):393-403.
20. Barrera Jr M, Castro FG, Strycker LA, Toobert DJ. Cultural adaptations of behavioral health interventions: A progress report. *Journal of Consulting and Clinical Psychology*. 2013 Apr;81(2):196-205.
21. Hawthorne K, Robles Y, Cannings-John R, Edwards AGK. Culturally appropriate health education for Type 2 diabetes in ethnic minority groups: a systematic and narrative review of randomized controlled trials. *Diabet Med*. 2010 Jun;27(6):613-23.
22. Kong A, Tussing-Humphreys LM, Odoms-Young AM, Stolley MR, Fitzgibbon ML. Systematic review of behavioural interventions with culturally adapted strategies to improve diet and weight outcomes in African American women. *Obes Rev*. 2014 Oct;15(Supplement 4):62-92.
23. Lie DA, Lee-Rey E, Gomez A, Bereknyci S, Braddock CH. Does cultural competency training of health professionals improve patient outcomes? A systematic review and proposed algorithm for future research. *J Gen Intern Med*. 2011 Mar;26(3):317-25.
24. Nam S, Janson SL, Stotts NA, Chesla C, Kroon L. Effect of culturally tailored diabetes education in ethnic minorities with type 2 diabetes: a meta-analysis. *J Cardiovasc Nurs*. 2012 Nov 1;27(6):505-18.
25. Pottie K, Hadi A, Chen J, Welch V, Hawthorne K. Realist review to understand the efficacy of culturally appropriate diabetes education programmes. *Diabetic Medicine*. 2013 Sep;30(9):1017-25.
26. Ricci-Cabello I, Ruiz-Pérez I, Rojas-García A, Pastor G, Rodríguez-Barranco M, Gonçalves DC. Characteristics and effectiveness of diabetes self-management educational programs targeted to racial/ethnic minority groups: a systematic review, meta-analysis and meta-regression. *BMC Endocr Disord*. 2014 Dec;14(1):1-3.

27. Zeh P, Sandhu HK, Cannaby AM, Sturt JA. The impact of culturally competent diabetes care interventions for improving diabetes-related outcomes in ethnic minority groups: a systematic review. *Diabet Med*. 2012 Oct;29(10):1237–52.
28. Dauvrin M, Lorant V, d’Hoore W. Is the chronic care model integrated into research examining culturally competent interventions for ethnically diverse adults with Type 2 diabetes mellitus? A review. *Evaluation & the Health Professions*. 2015 Feb 4;38(4):435–63.
29. Page-Reeves J, Niforatos J, Mishra S, Regino L, Gingrich A, Bulten R. Health Disparity and Structural Violence: How Fear Undermines Health Among Immigrants at Risk for Diabetes. *Journal of Health Disparities Research and Practice*. 2013 Jan 1;6(2):30–47.
30. Page-Reeves J, Mishra SI, Niforatos J, Regino L, Bulten R. An Integrated Approach to Diabetes Prevention: Anthropology, Public Health, and Community Engagement. *Qual Rep*. 2013;18:1–22.
31. Page-Reeves J, Regino L, McGrew HC, Tellez M, Pedigo B, Overby A, et al. Collaboration and outside-the-box thinking to overcome training-related challenges for including patient Stakeholders as data collectors in a patient-engaged research project. *Journal of Patient Experience*. 2018 Jun;5(2):88–91.
32. Page-Reeves J, Regino L. Current Challenges of Community-University Health Research Partnerships and Concrete, Plain Language Strategies to Building Capacity. *Anthropology in Action*. 2018;In Press.
33. Page-Reeves J, Regino L, Tellez M, Pedigo B, Perez E. Engaging Latino Patients in Diabetes Research: What We Are Learning. *Practicing Anthropology*. 2018;40(3):35–9.
34. McGrew HC, Regino L, Bleecker M, Tellez M, Pedigo B, Guerrero D, et al. Training Patient Stakeholders Builds Community Capacity, Enhances Patient Engagement in Research. *Journal of Community Engagement and Scholarship*. 2020;13(1):99–106.
35. Funnell MM, Brown TL, Childs BP, Haas LB, Hosey GM, Jensen B, et al. National Standards for diabetes self-management education. *Diabetes Care*. 2011 Jan;34(Supplement 1):S89-96.
36. Stellefson M, Dipnarine K, Stopka C. The chronic care model and diabetes management in US primary care settings: a systematic review. *Preventing Chronic Disease*. 2013;10:E26.
37. American Diabetes Association. Recognized Education Programs– DiabetesPro [Internet]. [cited 2015 Nov 10]. Available from: <https://professional.diabetes.org/diabetes-education>
38. Parchman ML, Zeber JE, Palmer RF. Participatory decision making, patient activation, medication adherence, and intermediate clinical outcomes in type 2 diabetes: a STARNet study. *Annals of Family Medicine*. 2010 Sep 1;8(5):410–7.
39. Edelman D, Gierisch JM, McDuffie JR, Oddone E, Williams JW. Shared medical appointments for patients with diabetes mellitus: a systematic review. *Journal of General Internal Medicine*. 2015 Jan;30(1):99–106.
40. Clark L, Vincent D, Zimmer L, Sanchez J. Cultural values and political economic contexts of diabetes among low-income Mexican Americans. *Journal of Transcultural Nursing*. 2009 Oct;20(4):382–94.
41. Flores G. Culture and the patient-physician relationship: achieving cultural competency in health care. *The Journal of Pediatrics*. 2000 Jan 1;136(1):14–23.

42. Marin G, Marin BV. Research with Hispanic populations. Sage Publications, Inc; 1991.
43. Trickett EJ, Beehler S, Deutsch C, Green LW, Hawe P, McLeroy K, et al. Advancing the science of community-level interventions. *American Journal of Public Health*. 2011 Aug;101(8):1410–9.
44. Trickett EJ. Multilevel community-based culturally situated interventions and community impact: an ecological perspective. *American Journal of Community Psychology*. 2009 Jun;43:257–66.
45. Sixta CS, Ostwald S. Texas-Mexico border intervention by promotores for patients with type 2 diabetes. *The Diabetes Educator*. 2008 Mar;34(2):299–309.
46. Garcia AA, Villagomez ET, Brown SA, Kouzekanani K, Hanis CL. The Starr County Diabetes Education Study: development of the Spanish-language diabetes knowledge questionnaire. *Diabetes Care*. 2001 Jan 1;24(1):16–21.
47. Vincent D, Pasvogel A, Barrera L. A feasibility study of a culturally tailored diabetes intervention for Mexican Americans. *Biological Research for Nursing*. 2007 Oct;9(2):130–41.
48. Kim S, Love F, Quistberg DA, Shea JA. Association of health literacy with self-management behavior in patients with diabetes. *Diabetes Care*. 2004 Dec 1;27(12):2980–2.
49. Shah VO, Carroll C, Mals R, Ghahate D, Bobelu J, Sandy P, et al. A Home-Based Educational Intervention Improves Patient Activation Measures and Diabetes Health Indicators among Zuni Indians. *PLoS ONE*. 2015 May 8;10(5):e0125820.
50. Wolever RQ, Dreusicke M, Fikkan J, Hawkins TV, Yeung S, Wakefield J, et al. Integrative health coaching for patients with type 2 diabetes: a randomized clinical trial. *The Diabetes Educator*. 2010 Jul;36(4):629–39.
51. Druss BG, Zhao L, von Esenwein SA, Bona JR, Fricks L, Jenkins-Tucker S, et al. The Health and Recovery Peer (HARP) Program: A peer-led intervention to improve medical self-management for persons with serious mental illness. *Schizophrenia Research*. 2010 May 1;118:264–70.
52. Grønning K, Rannestad T, Skomsvoll JF, Rygg LØ, Steinsbekk A. Long-term effects of a nurse-led group and individual patient education programme for patients with chronic inflammatory polyarthritis - a randomised controlled trial. *Journal of Clinical Nursing*. 2014 Apr;23(7–8):1005–17.
53. Lorig K, Ritter PL, Villa FJ, Armas J. Community-based peer-led diabetes self-management: a randomized trial. *The Diabetes Educator*. 2009 Jul;35(4):641–51.
54. Huang FY, Chung H, Kroenke K, Delucchi KL, Spitzer RL. Using the Patient Health Questionnaire-9 to measure depression among racially and ethnically diverse primary care patients. *Journal of General Internal Medicine*. 2006 Jun;21(6):547–52.
55. Gilbody S, Richards D, Brealey S, Hewitt C. Screening for depression in medical settings with the Patient Health Questionnaire (PHQ): a diagnostic meta-analysis. *Journal of General Internal Medicine*. 2007 Nov;22(11):1596–602.
56. Reuland DS, Cherrington A, Watkins GS, Bradford DW, Blanco RA, Gaynes BN. Diagnostic accuracy of Spanish language depression-screening instruments. *Annals of Family Medicine*. 2009 Sep 1;7(5):455–62.
57. Looker HC, Knowler WC, Hanson RL. Changes in BMI and weight before and after the development of type 2 diabetes. *Diabetes Care*. 2001 Nov 1;24(11):1917–22.

58. Avery L, Flynn D, van Wersch A, Sniehotta FF, Trenell MI. Changing physical activity behavior in type 2 diabetes: a systematic review and meta-analysis of behavioral interventions. *Diabetes Care*. 2012 Dec 1;35(12):2681–9.
59. Bogner HR, Morales KH, de Vries HF, Cappola AR. Integrated management of type 2 diabetes mellitus and depression treatment to improve medication adherence: a randomized controlled trial. *Annals of Family Medicine*. 2012 Jan 1;10(1):15–22.
60. Lorig K, Ritter PL, Laurent DD, Plant K, Green M, Jernigan VBB, et al. Online diabetes self-management program: a randomized study. *Diabetes Care*. 2010 Jun 1;33(6):1275–81.
61. United States Census Bureau. American Community Survey Demographics and Housing Estimates 2012 [Internet]. [cited 2014 Sep 1]. Available from: <https://www.census.gov/data/developers/data-sets/acs-5year/2012.html>
62. Alderman SL, O'Donnell K, Monaco K. Bare Bones Budget: Measuring the Minimum Income Needed for the Bare Necessities of Families in New Mexico [Internet]. Albuquerque, NM: New Mexico Voices for Children; 2003. Available from: <http://www.nmvoices.org/attachments/bbbfullreport.pdf>
63. Page-Reeves J, Regino L, Erhardt EB, Murray-Krezan C, Pedigo B, Tellez M, et al. Patient-Centered Framework to Identify Culturally and Contextually Appropriate Options for Latinos with Diabetes from Low-Income Households. Patient-Centered Outcomes Research Institute; In Press.
64. Schiøtz ML, Bøgelund M, Almdal T, Jensen BB, Willaing I. Social support and self-management behaviour among patients with Type 2 diabetes. *Diabetic Medicine: A Journal of the British Diabetic Association*. 2012 May;29(5):654–61.
65. Rygg LØ, Rise MB, Grønning K, Steinsbekk A. Efficacy of ongoing group based diabetes self-management education for patients with type 2 diabetes mellitus. A randomised controlled trial. *Patient Education and Counseling*. 2012 Jan 1;86(1):98–105.
66. Hibbard JH, Mahoney ER, Stock R, Tusler M. Do increases in patient activation result in improved self-management behaviors? *Health Services Research*. 2007 Aug;42(4):1443–63.
67. Hibbard JH, Mahoney E. Toward a theory of patient and consumer activation. *Patient Education and Counseling*. 2010 Mar;78(3):377–81.
68. Hibbard JH. Community-based participation approaches and individual health activation. *The Journal of Ambulatory Care Management*. 2009 Oct 1;32(4):275–7.
69. Hendriks M, Rademakers J. Relationships between patient activation, disease-specific knowledge and health outcomes among people with diabetes; a survey study. *Health Services Research*. 2014 Dec;14:1–9.
70. Dixon A, Hibbard J, Tusler M. How do People with Different Levels of Activation Self-Manage their Chronic Conditions? *The Patient: Patient-Centered Outcomes Research*. 2009 Dec;2(4):257–68.
71. Hibbard JH, Mahoney ER, Stockard J, Tusler M. Development and testing of a short form of the patient activation measure. *Health Services Research*. 2005 Dec;40(6p1):1918–30.
72. Erhardt E, Murray-Krezan C, Regino L, Perez D, Bearer EL, Page-Reeves, Janet. Associations Between Depression and Diabetes Among Latinx Patients from Low-Income Households in New Mexico. *Social Science & Medicine*. 2023 Jan;320:115713.

73. Buuren S van, Groothuis-Oudshoorn K. mice: Multivariate Imputation by Chained Equations in R. *Journal of Statistical Software*. 2011 Dec 12;45(3):1–67.
74. Hammersley M. *Questioning Qualitative Inquiry: Critical Essays*. London: Sage; 2008.
75. Patient-Centered Outcomes Research Institute (PCORI). A Patient-Centered Framework to Test the Comparative Effectiveness of Culturally and Contextually Appropriate Program Options for Latinos with Diabetes from Low-Income Households [Internet]. 2016 [cited 2018 Sep 25]. Available from: <https://www.pcori.org/research-results/2016/comparing-two-programs-help-latino-patients-low-income-households-manage-their-diabetes>
76. Kroenke K, Spitzer RL, Williams JBW. The PHQ-9: Validity of a Brief Depression Severity Measure. *Journal of General Internal Medicine*. 2001 Sep 1;16(9):606–13.
77. Agency for Healthcare Research and Quality. About the CAHPS Cultural Competence Item Set [Internet]. 2012 [cited 2021 May 16]. Available from: [https://archive.ahrq.gov/cahps/surveys-guidance/item-sets/cultural/2312\\_about\\_cultural\\_comp.pdf](https://archive.ahrq.gov/cahps/surveys-guidance/item-sets/cultural/2312_about_cultural_comp.pdf)
78. Bates D, Mächler M, Bolker B, Walker S. Fitting Linear Mixed-Effects Models Using lme4. *Journal of Statistical Software*. 2015;67(1):1–48.
79. Kuznetsova A, Brockhoff PB, Christensen RHB. lmerTest Package: Tests in Linear Mixed Effects Models. *Journal of Statistical Software*. 2017 Dec 6;82(13):1–26.
80. Insignia Health. Patient Activation Measure (PAM)® [Internet]. Products. 2021 [cited 2016 Feb 2]. Available from: <http://www.insigniahealth.com/products/pam-survey>
81. Whittemore R. Culturally competent interventions for Hispanic adults with type 2 diabetes: a systematic review. *Journal of Transcultural Nursing*. 2007 Apr;18(2):157–66.
82. Skyler JS, Bergenstal R, Bonow RO, Buse J, Deedwania P, Gale EA, et al. Intensive glycemic control and the prevention of cardiovascular events: implications of the ACCORD, ADVANCE, and VA diabetes trials: a position statement of the American Diabetes Association and a scientific statement of the American College of Cardiology Foundation and the American Heart Association. *Journal of the American College of Cardiology*. 2009 Jan 20;53(3):298–304.
83. Arnold LW, Wang Z. The HbA1c and all-cause mortality relationship in patients with type 2 diabetes is J-shaped: a meta-analysis of observational studies. *The review of diabetic studies*. 2014;11(2).
84. Diabetes Control and Complications Trial Research Group. The relationship of glycemic exposure (HbA1c) to the risk of development and progression of retinopathy in the diabetes control and complications trial. *Diabetes*. 1995 Aug 1;44(8):968–83.
85. Sherwani SI, Khan HA, Ekhzaimy A, Masood A, Sakharkar MK. Significance of HbA1c test in diagnosis and prognosis of diabetic patients. *Biomarker insights*. 2016 Jan;11:95–104.
86. Pankratz VS, Choi EE, Qeadan F, Ghahate D, Bobelu J, Nelson RG, et al. Diabetes status modifies the efficacy of home-based kidney care for Zuni Indians in a randomized controlled trial. *Journal of Diabetes and its Complications*. 2021 Feb 1;35(2):1–6.
87. Huang ES, Liu JY, Moffet HH, John PM, Karter AJ. Glycemic control, complications, and death in older diabetic patients: the diabetes and aging study. *Diabetes care*. 2011 Jun 1;34(6):1329–36.

88. Alameri M, Wafa W, AlTikriti A, Saadane I, Alkaf B, Lessan N. Incidence and Rate of Progression of Prediabetes to Type 2 Diabetes: A 10-Year Retrospective Study From UAE. *Endocrine Practice*. 2019 Apr 1;25:141–2.
89. Nelson RG, Pankratz VS, Ghahate DM, Bobelu J, Faber T, Shah VO. Home-based kidney care, patient activation, and risk factors for CKD progression in Zuni Indians: a randomized, controlled clinical trial. *Clinical Journal of the American Society of Nephrology*. 2018 Dec 7;13(12):1801–9.
90. Page-Reeves J, Murray-Krezan C, Regino L, Perez J, Bleecker M, Perez D, et al. A randomized control trial to test a peer support group approach for reducing social isolation and depression among female Mexican immigrants. *BMC public health*. 2021 Dec;21(1):1–18.
91. Page-Reeves J, Shrum S, Rohan-Minjares F, Thiedeman T, Perez J, Murrietta A, et al. Addressing Syndemic Health Disparities Among Latin Immigrants Using Peer Support. *Journal of Racial and Ethnic Health Disparities*. 2019 Apr;6(2):380–92.
92. Page-Reeves J, Moffett ML, Steimel L, Smith DT. The evolution of an innovative community-engaged health navigator program to address social determinants of health. *Progress in Community Health Partnerships: Research, Education, and Action*. 2016;10(4):603–10.
93. Page-Reeves J editor. *Women Redefining the Experience of Food Insecurity: Life Off the Edge of the Table*. Lexington Books; 2014.
94. Page-Reeves J. Conceptualizing Food Insecurity and Women’s Agency: A Synthetic Introduction. In: Page-Reeves J, editor. *Women Redefining the Experience of Food Insecurity: Life Off the Edge of the Table*. Lanham, Maryland: Lexington Books; 2014. p. 3–44.
95. Janet Page-Reeves, Amy Anixter Scott, Maurice Moffett, Veronica Apodaca, Vanessa Apodaca. “Is always that sense of wanting ... never really being satisfied”: Women’s Quotidian Struggles With Food Insecurity in a Hispanic Community in New Mexico. *Journal of Hunger & Environmental Nutrition*. 2014 Apr 3;9(2):183–209.

## **Supporting Information**

### **Funding statement**

Production of this article was funded through Patient-Centered Outcomes Research Institute (PCORI) Awards (Tier I-#7738704, Tier II-#7738704, & #CER-1511-32910). The views presented in this work are solely the responsibility of the authors and do not necessarily represent the views of PCORI, its Board of Governors or Methodology Committee. Additional personnel training and clinical laboratory expertise was provided by the University of New Mexico Clinical and Translational Research Center (NCATS #8UL1TR000041). Dr. Mishra was also supported in part by the UNM Comprehensive Cancer Center (UNMCCC) Support Grant NIH/NCI P30CA118100. Bearer is partially funded by The Harvey Family Endowment.

### **Human subjects approval**

This study was approved by the Human Research Protections Office at the University of New Mexico (#16-303). All participants provided signed informed consent.

### **ClinicalTrials.gov registration**

This study was registered with ClinicalTrials.gov #NCT03004664.

## Supplement

### Additional questions for Patients

Table S 1. Two added questions to the but were not included in the total scoring.

11. La persona que me brinda apoyo social es parte importante en el manejo de mi condición. / My social support is an important part of managing my condition.

- 1 Totalmente de acuerdo / Strongly agree
- 2 Un poco de acuerdo / Somewhat agree
- 3 Neutral / Neutral
- 4 Un poco en desacuerdo / Somewhat disagree
- 5 Totalmente en desacuerdo / Strongly disagree

12. [prog] me provee herramientas y recursos para manejar mejor mi condición. / [prog] provides me with tools and resources to better manage my condition.

- 1 Totalmente de acuerdo / Strongly agree
- 2 Un poco de acuerdo / Somewhat agree
- 3 Neutral / Neutral
- 4 Un poco en desacuerdo / Somewhat disagree
- 5 Totalmente en desacuerdo / Strongly disagree



## Diabetes Knowledge Questionnaire

Table S 2. Patients incorrectly answered “yes” to these DKQ questions most often. Interestingly, 100% of all patients correctly answered the question whether people with diabetes should take extra care when cutting their toenails.

| <b>Incorrect</b> | <b>Number</b>           | <b>Question</b>                                                                      |
|------------------|-------------------------|--------------------------------------------------------------------------------------|
| 86.2%            | Question #17            | <i>“A person with diabetes should cleanse a cut with iodine and alcohol”</i>         |
| 80.1%            | Question #1             | <i>“Eating too much sugar and other sweet foods is a cause of diabetes”</i>          |
| 79.8%            | Additional Question #25 | <i>“Drinking too many sugary drinks, such as sodas, is a cause of diabetes”</i>      |
| 75.3%            | Question #21            | <i>“Shaking and sweating are signs of high blood sugar”</i>                          |
| 66.0%            | Question #24            | <i>“A diet for people with diabetes consists mostly of special foods”</i>            |
| 54.1%            | Question #3             | <i>“Diabetes is caused by failure of the kidneys to keep sugar out of the urine”</i> |
| 51.7%            | Question #12            | <i>“An insulin reaction is caused by too much food”</i>                              |
| 44.3%            | Question #22            | <i>“Frequent urination and thirst are signs of low blood sugar”</i>                  |
| 25.5%            | Question #13            | <i>“Medication is more important than diet and exercise to control my diabetes”</i>  |

## Patient Activation Measure

Table S 3. Patients answered "disagree" or "neutral" to these PAM questions most often (questions are paraphrased so as to conform to the PAM license agreement).

| <b>Disagree or Neutral</b> | <b>Number</b> | <b>Question</b>                                                             |
|----------------------------|---------------|-----------------------------------------------------------------------------|
| 20.5%                      | Question #4   | Confident about choosing medical attention or self-care for a health issue. |
| 26.9%                      | Question #7   | Can stick to positive diet and exercise goals.                              |
| 20.4%                      | Question #8   | Knowledgeable in preventing health issues.                                  |
| 16.8%                      | Question #9   | Confident in my ability to find solutions to new health problems.           |
| 19.9%                      | Question #10  | Even during stress, can stick to positive diet and exercise goals.          |
